# Supplementary material for: Creation and stabilization of carbon dots in silica-confined compartments with high thermal stability
Source: Royal Society of Chemistry journal article supplement (doi:10.1039/d2cc06905a), 2023-01-01
Supplement: d2cc06905a1.pdf [file d2cc06905a1.pdf]

**Creation and stabilization of carbon dots in silica-confined  
compartments with high thermal stability**

Huan-Huan Zhang, Chuan-De Wu\*

*Key Laboratory of Excited-State Material of Zhejiang Province and State Key  
Laboratory of Silicon Materials, Department of Chemistry, Zhejiang University,  
Hangzhou, 310027, P. R. China*

E-mail address: [cdwu@zju.edu.cn](mailto:cdwu@zju.edu.cn)

## Experimental Section

### Materials and methods

Tetraethyl orthosilane (TEOS), (3-aminopropyl)triethoxysilane (APTES), and citric acid (CA) were all purchased from Chemical Energy Co., Ltd. All reagents were used as received without further purification. The morphologies of solid materials were analyzed by high resolution transmission electron microscopy (HRTEM) on a JEM 2100F equipment and transmission electron microscope (TEM) on a Hitachi HT-7700 equipment. UV-visible diffuse reflection (UV-Vis DRS) spectra were obtained with a TU-1901 spectrophotometer equipped with an integrating sphere by using BaSO<sub>4</sub> as a reflectance standard. Photoluminescence (PL) measurements were performed on a Hitachi F4600 fluorescence spectrometer at room temperature. The fluorescence decay curves of CDs@SiO<sub>2</sub> composite were obtained by using an EPL laser (375 nm) as the excitation source and the single-photo counting detector (ID-100) to collect emitting light. X-ray photoelectron spectroscopy (XPS) was recorded on a Thermo Scientific K-Alpha spectroscopy with Al-K $\alpha$  irradiation (1486.6 eV), and the binding energies were calibrated using the C1s peak at 284.8 eV. Fourier transform infrared spectrometer (FT-IR) spectra were performed from KBr pellets on a Nicolet iS10 spectrophotometer in the range of 500-4000 cm<sup>-1</sup>. Thermogravimetric analysis (TGA) experiments were carried out on a Pyris 1 TGA (Perkin-Elmer), and the heating rate is of 10 °C/min under N<sub>2</sub> and air atmospheres. N<sub>2</sub> adsorption/desorption isotherms were performed on a Micromeritics ASAP 2460 surface area analyzer. The static water contact angles were carried out by using sessile method on a JY-82C system at room temperature.

### **Synthesis of CDs@SiO<sub>2</sub> composite**

Citric acid (0.25 mmol) was dissolved in a mixture of deionized water (10 mL) and methanol (45 mL). Then, TEOS (22.5 mL) was drop-added to the mixture under vigorous stirring. APTES (0.25 mmol) was added under continuously stirring at room temperature, and reacted for 6 h. The obtained gel was subsequently dried and aged at 80 °C for 2 days. The resulted white solid was pyrolyzed at 400 °C under nitrogen atmosphere to obtain CDs@SiO<sub>2</sub>. The synthetic procedure of CDs@SiO<sub>2</sub>-xR was similar to that of CDs@SiO<sub>2</sub>, except that different amount of citric acid was added (xR represents the molar ratio of TEOS and CA).

### **Synthesis of unprotected CDs**

5.0 mmol of CA and 5 mmol of APTES were dissolved in 25 mL of H<sub>2</sub>O, and stirred at room temperature for 2 h. The mixture was transferred into a 50 mL teflon-lined stainless-steel autoclave, heated to 200 °C, and kept at this temperature for 12 h. After cooling to room temperature, the resulted solid was collected by filtration, washed with H<sub>2</sub>O and EtOH, and finally dried in vacuum at 50 °C overnight to obtain unprotected CDs.<sup>[S1]</sup>

## Figures

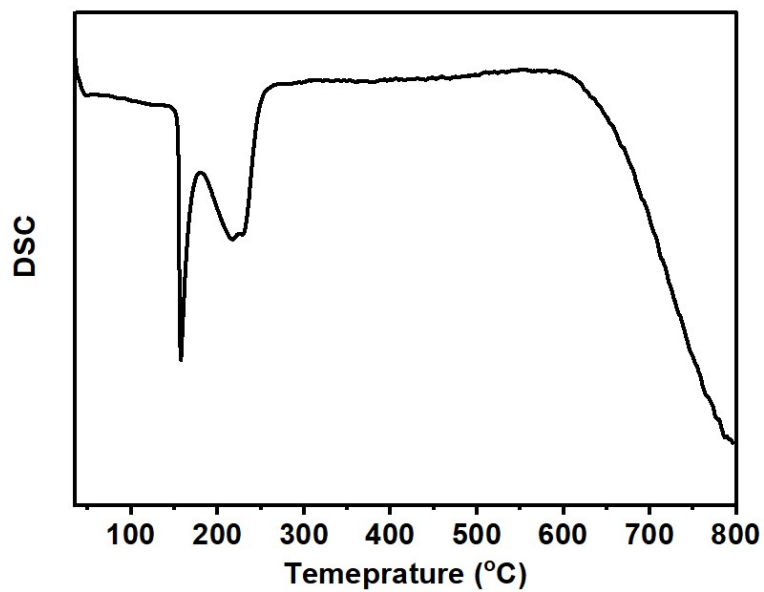

**Fig. S1** DSC curve of citric acid under nitrogen atmosphere.

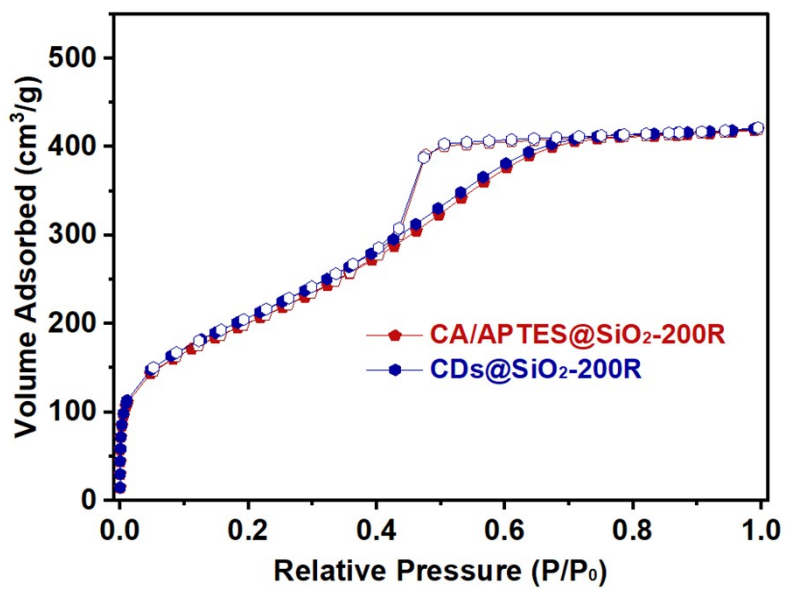

**Fig. S2** N<sub>2</sub> sorption isotherms of CA/APTES@SiO<sub>2</sub>-200R and CDs@SiO<sub>2</sub>-200R.

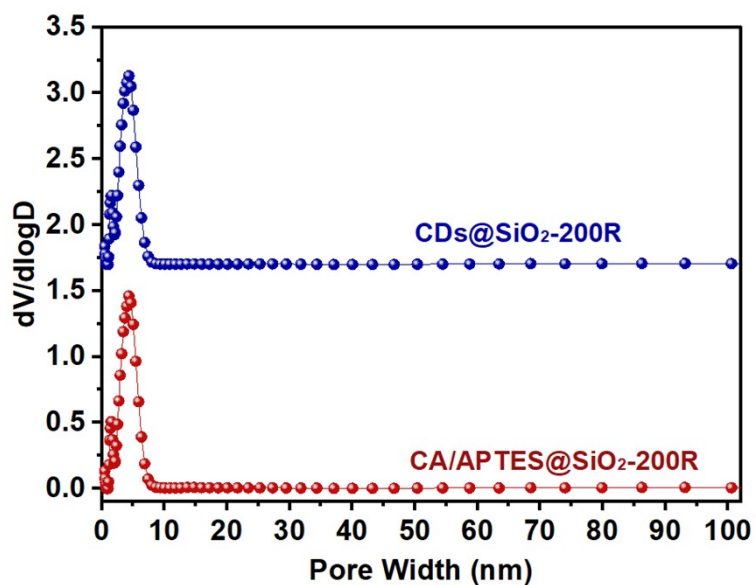

**Fig. S3** Pore size distributions of CA/APTES@SiO<sub>2</sub>-200R and CDs@SiO<sub>2</sub>-200R.

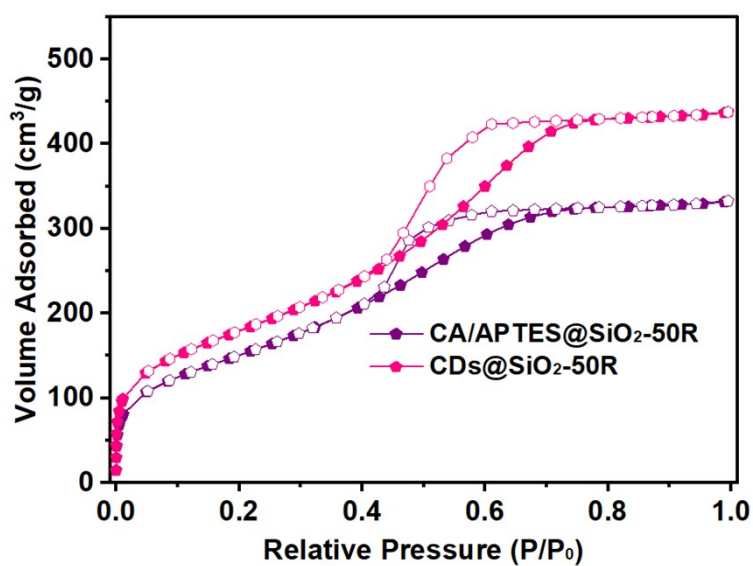

**Fig. S4** N<sub>2</sub> sorption isotherms of CA/APTES@SiO<sub>2</sub>-50R and CDs@SiO<sub>2</sub>-50R.

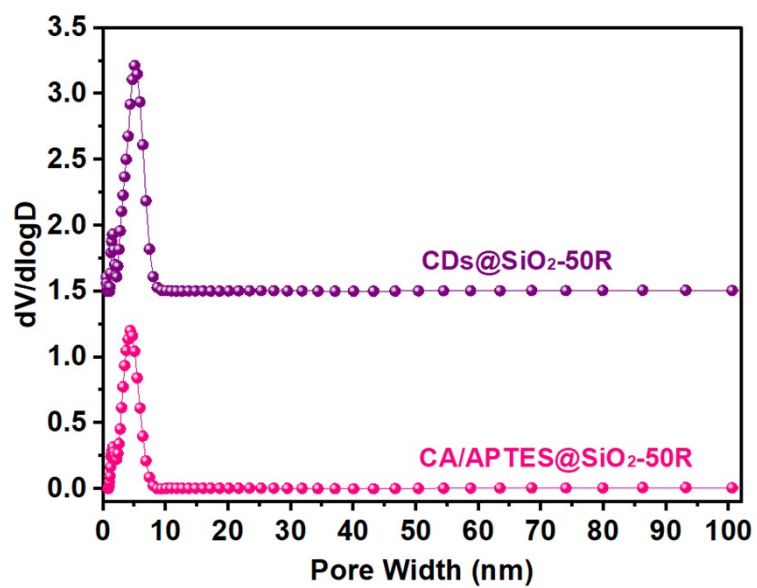

**Fig. S5** Pore size distributions of CA/APTES@SiO<sub>2</sub>-50R and CDs@SiO<sub>2</sub>-50R.

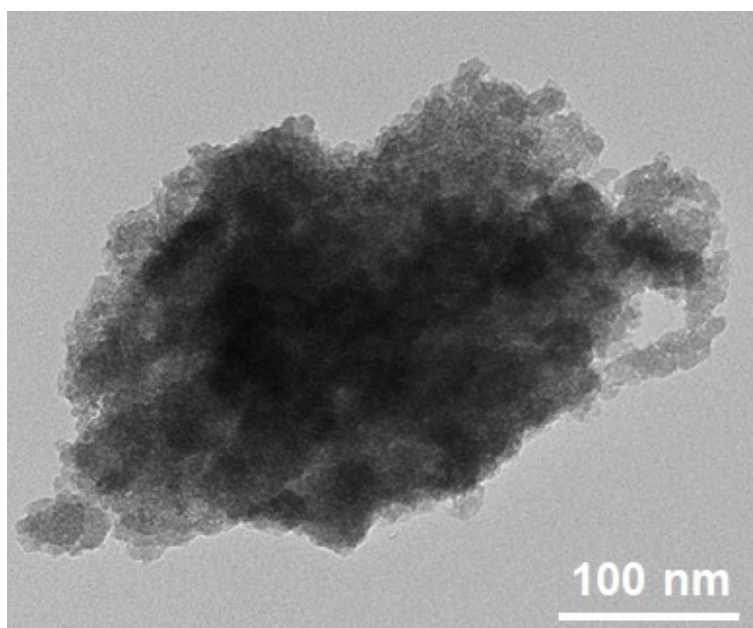

**Fig. S6** TEM image of CDs@SiO<sub>2</sub> annealed at 100 °C.

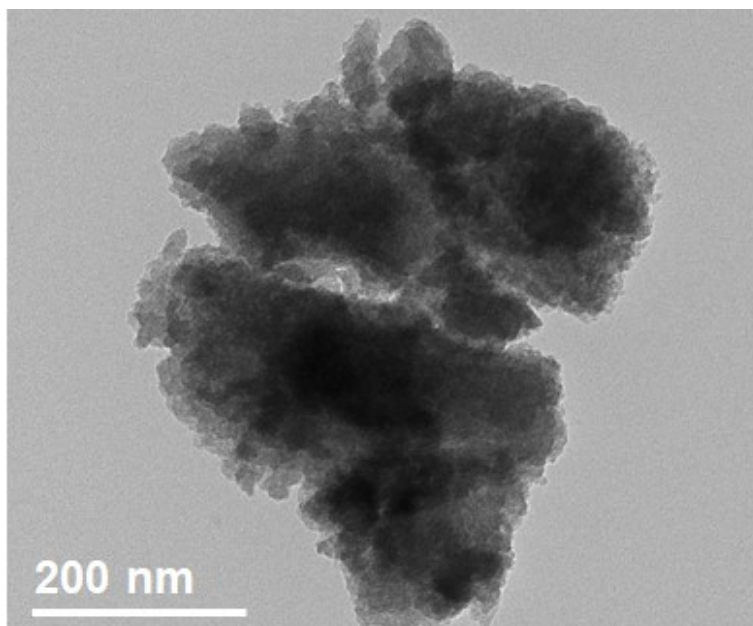

**Fig. S7** TEM image of CDs@SiO<sub>2</sub> annealed at 200 °C.

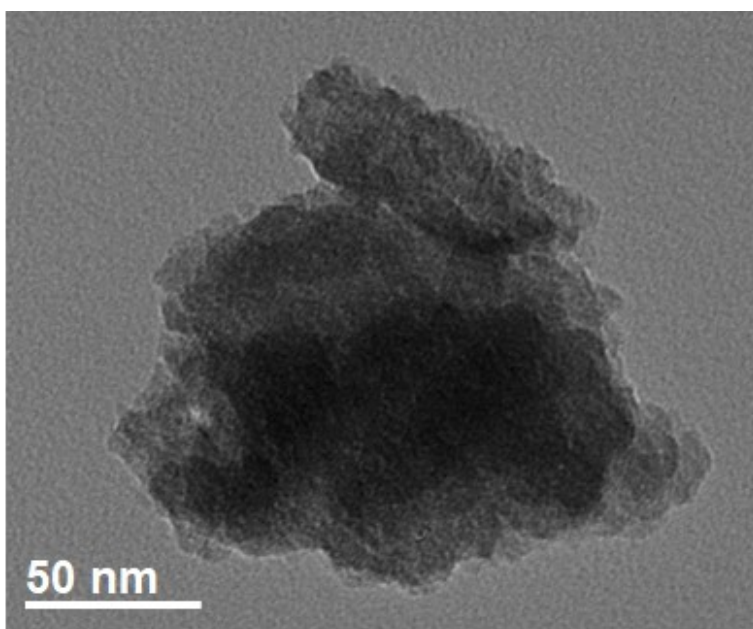

**Fig. S8** TEM image of CDs@SiO<sub>2</sub> annealed at 300 °C.

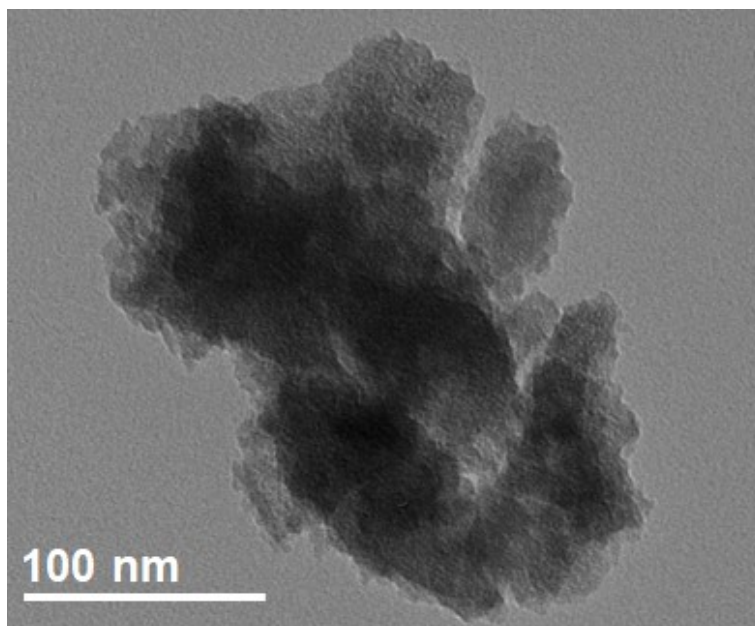

**Fig. S9** TEM image of CDs@SiO<sub>2</sub> annealed at 400 °C.

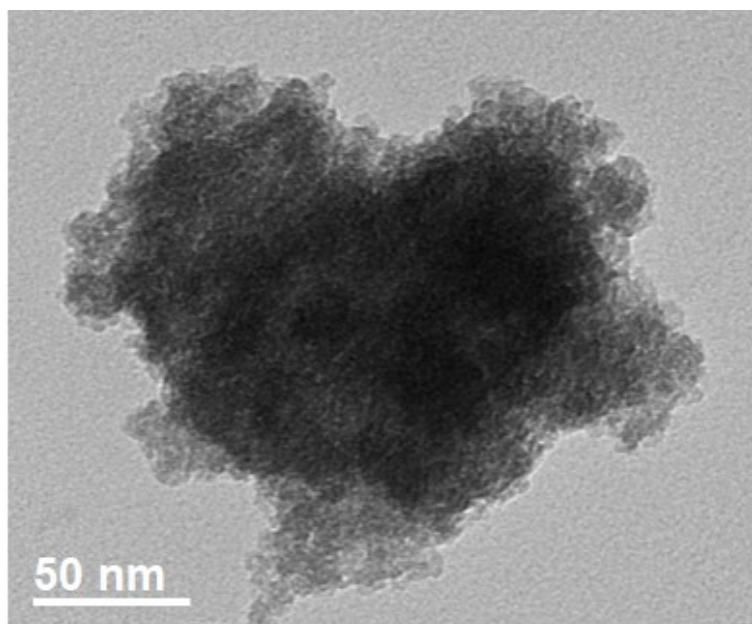

**Fig. S10** TEM image of CDs@SiO<sub>2</sub> annealed at 500 °C.



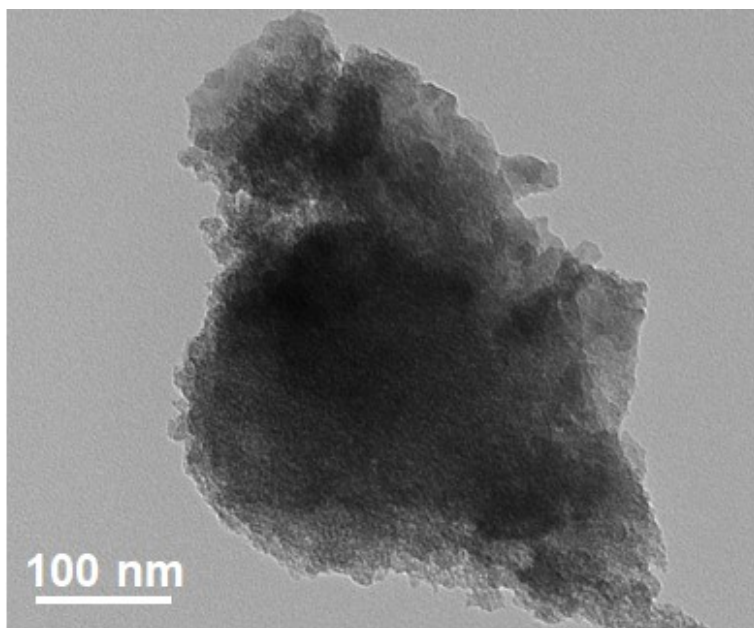

**Fig. S11** TEM image of CDs@SiO<sub>2</sub> annealed at 600 °C.

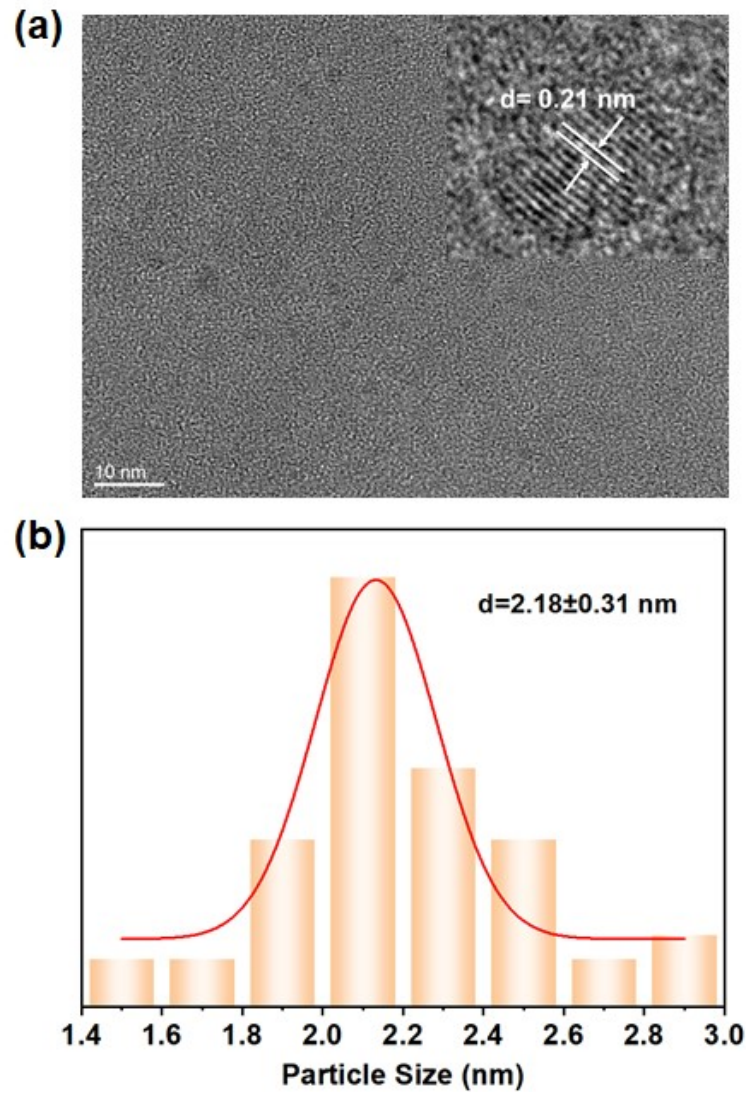

**Fig. S12** (a) HRTEM images (inset: lattice spacing) and (b) histograms of particle size distribution of CDs released from CDs@SiO<sub>2</sub> annealed at 200 °C.

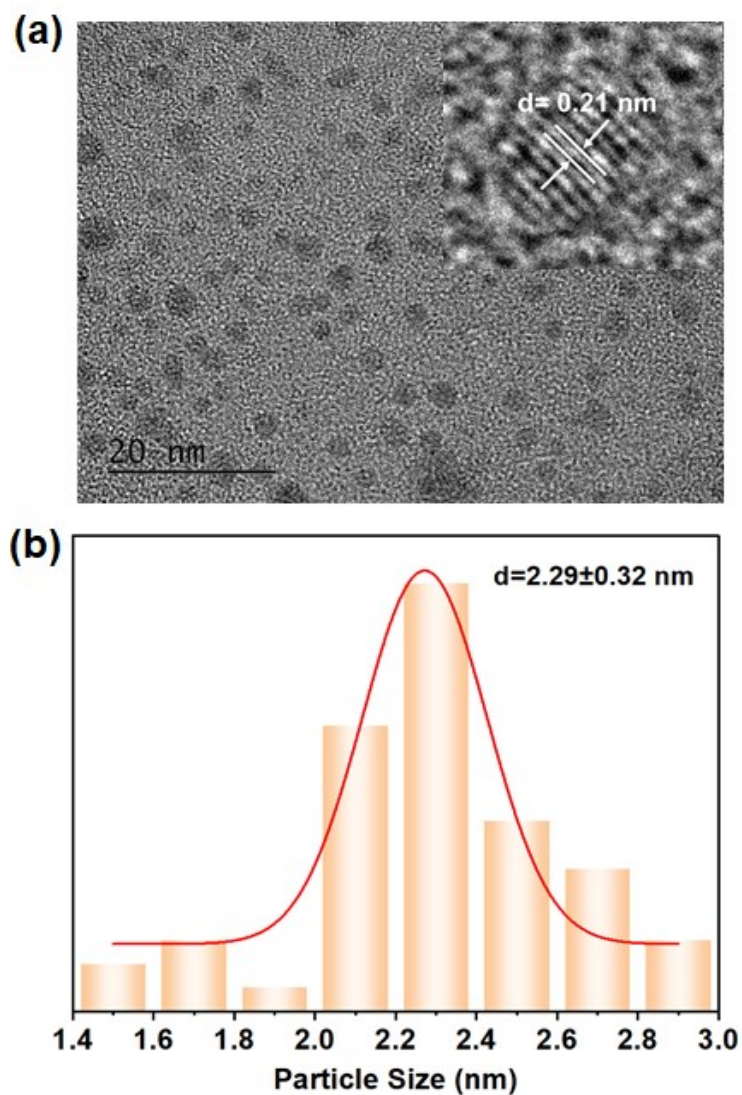

**Fig. S13** (a) HRTEM images (inset: lattice spacing) and (b) histograms of particle size distribution of CDs released from CDs@SiO<sub>2</sub> annealed at 300 °C.

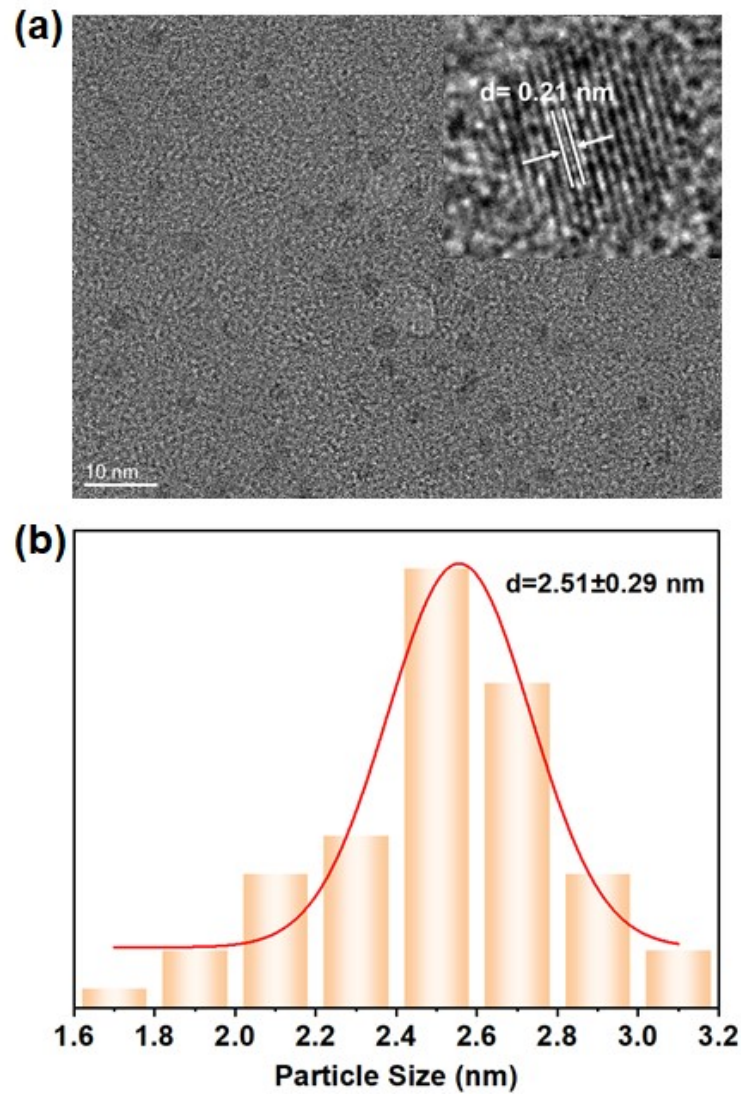

**Fig. S14** (a) HRTEM images (inset: lattice spacing) and (b) histograms of particle size distribution of CDs released from CDs@SiO<sub>2</sub> annealed at 500 °C.

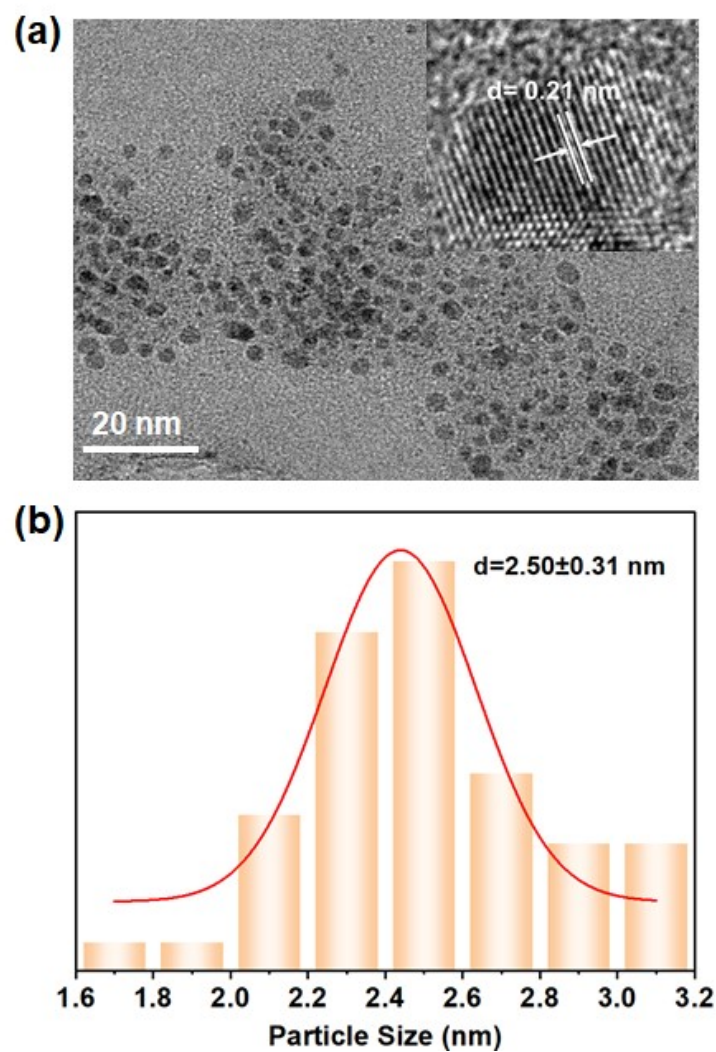

**Fig. S15** (a) HRTEM images (inset: lattice spacing) and (b) histograms of particle size distribution of CDs released from CDs@SiO<sub>2</sub> annealed at 600 °C.

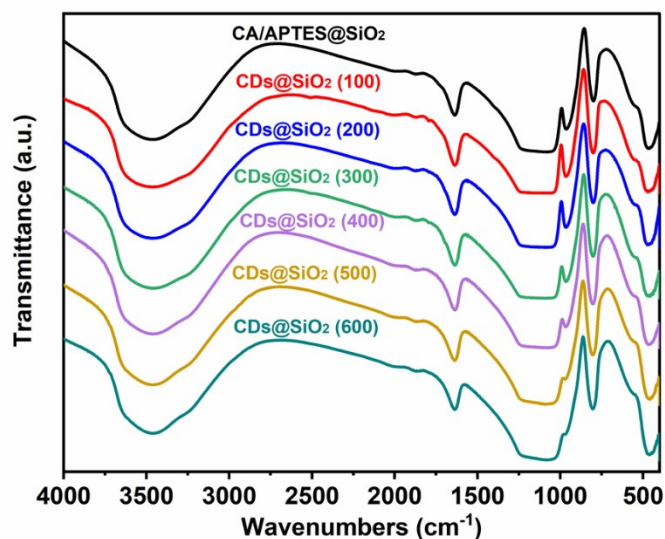

**Fig. S16** FT-IR spectra of CA/APTES@SiO<sub>2</sub> and the annealed samples at different temperatures (the number in the parenthesis represents the annealing temperature).

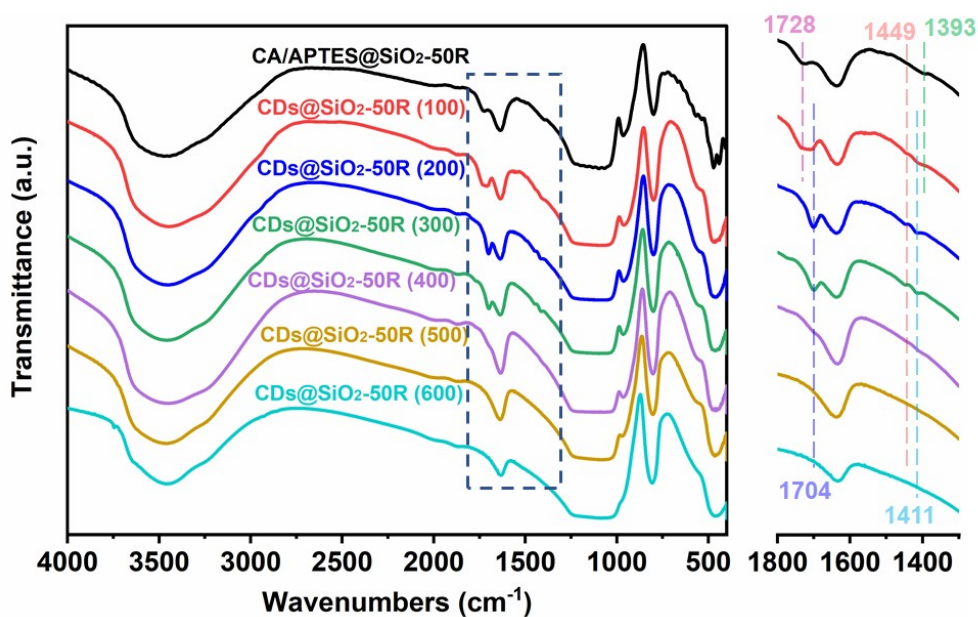

**Fig. S17** FT-IR spectra of CA/APTES@SiO<sub>2</sub>-50R and the annealed samples at different temperatures (the number in the parenthesis represents the annealing temperature).

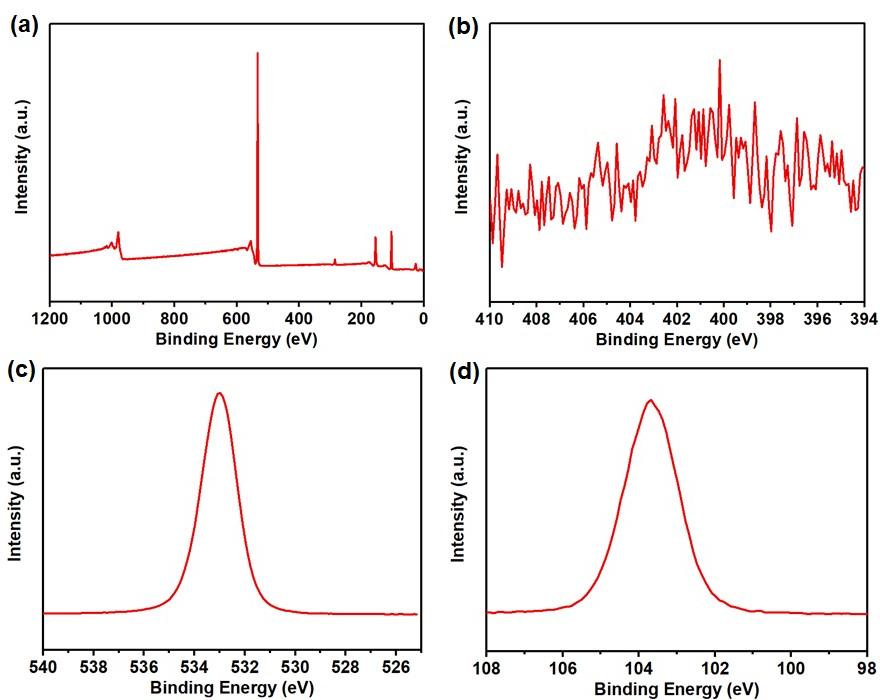

**Fig. S18** The XPS spectra of survey (a), N 1s (b), O 1s (c) and Si 2p (d) for CDs@SiO<sub>2</sub> annealed at 100 °C.

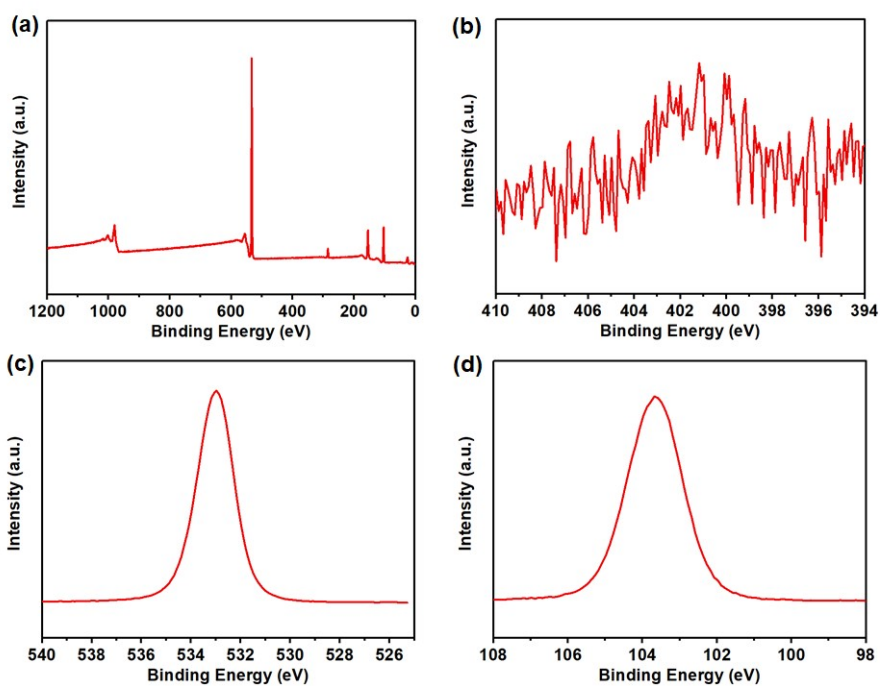

**Fig. S19** The XPS spectra of survey (a), N 1s (b), O 1s (c) and Si 2p (d) for CDs@SiO<sub>2</sub> annealed at 200 °C.

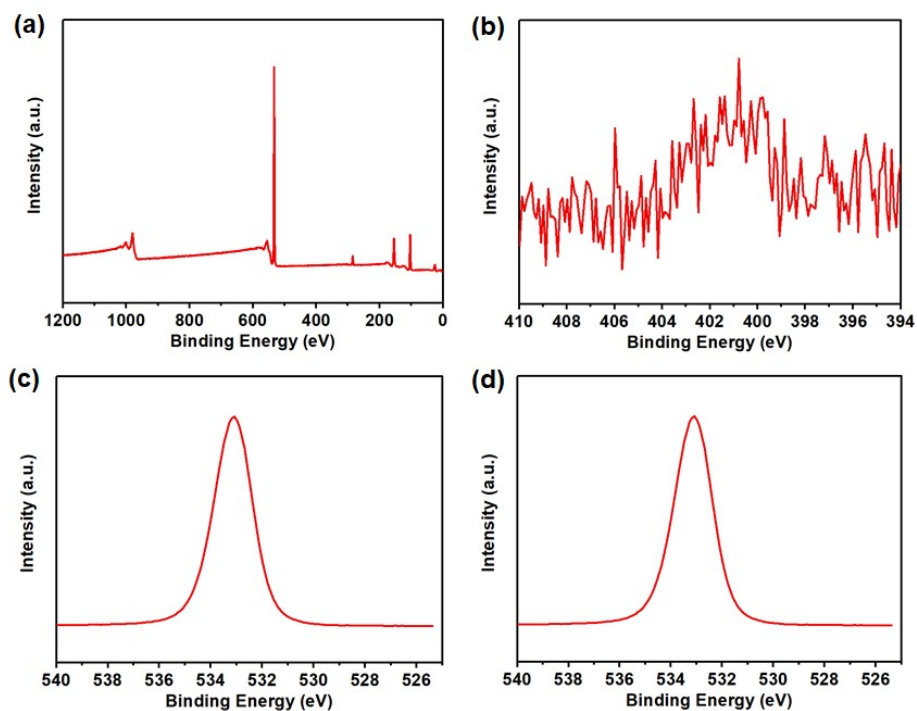

**Fig. S20** The XPS spectra of survey (a), N 1s (b), O 1s (c) and Si 2p (d) for CDs@SiO<sub>2</sub> annealed at 300 °C.

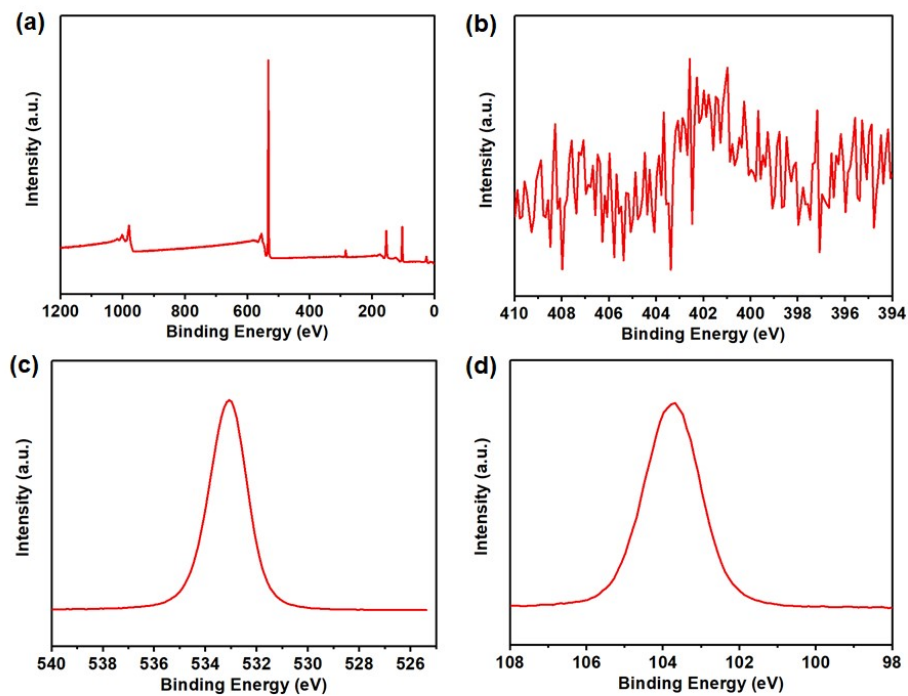

**Fig. S21** The XPS spectra of survey (a), N 1s (b), O 1s (c) and Si 2p (d) for CDs@SiO<sub>2</sub> annealed at 400 °C.



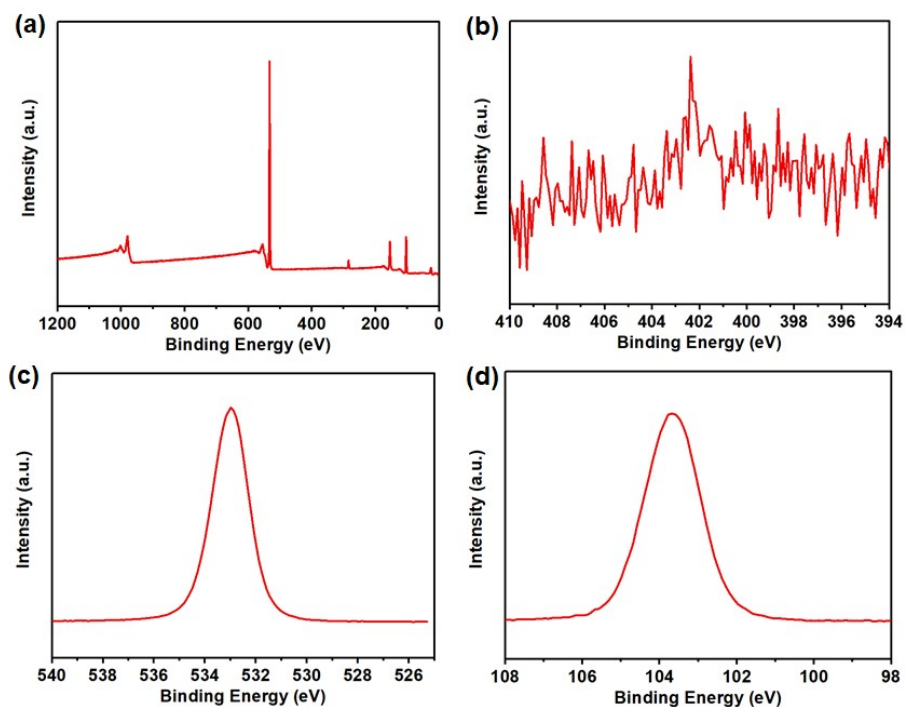

**Fig. S22** The XPS spectra of survey (a), N 1s (b), O 1s (c) and Si 2p (d) for CDs@SiO<sub>2</sub> annealed at 500 °C.

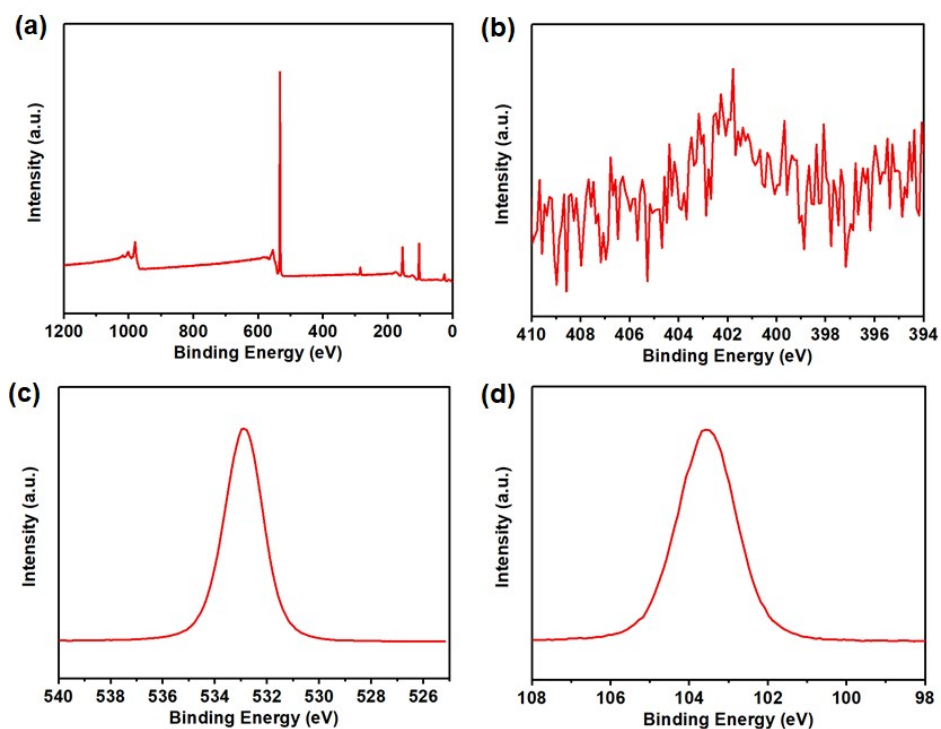

**Fig. S23** The XPS spectra of survey (a), N 1s (b), O 1s (c) and Si 2p (d) for CDs@SiO<sub>2</sub> annealed at 600 °C.

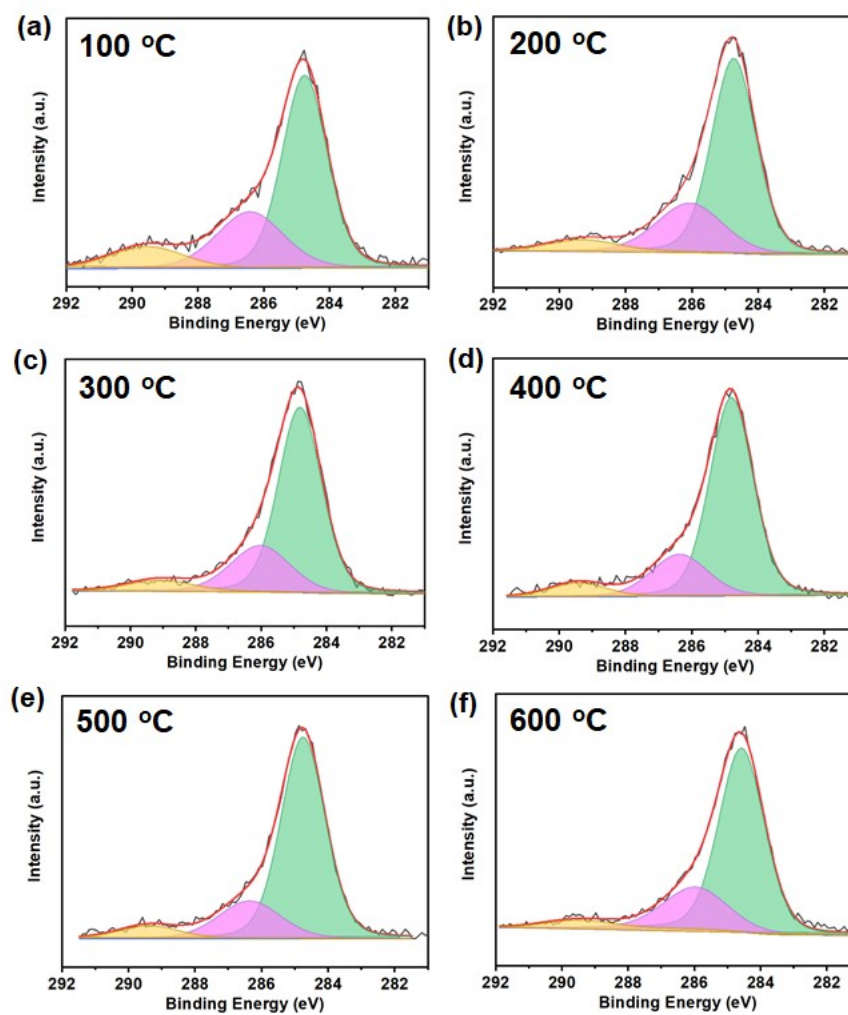

**Fig. S24** The C 1s XPS spectra of the annealed products of CA/APTES@SiO<sub>2</sub> at different temperatures.

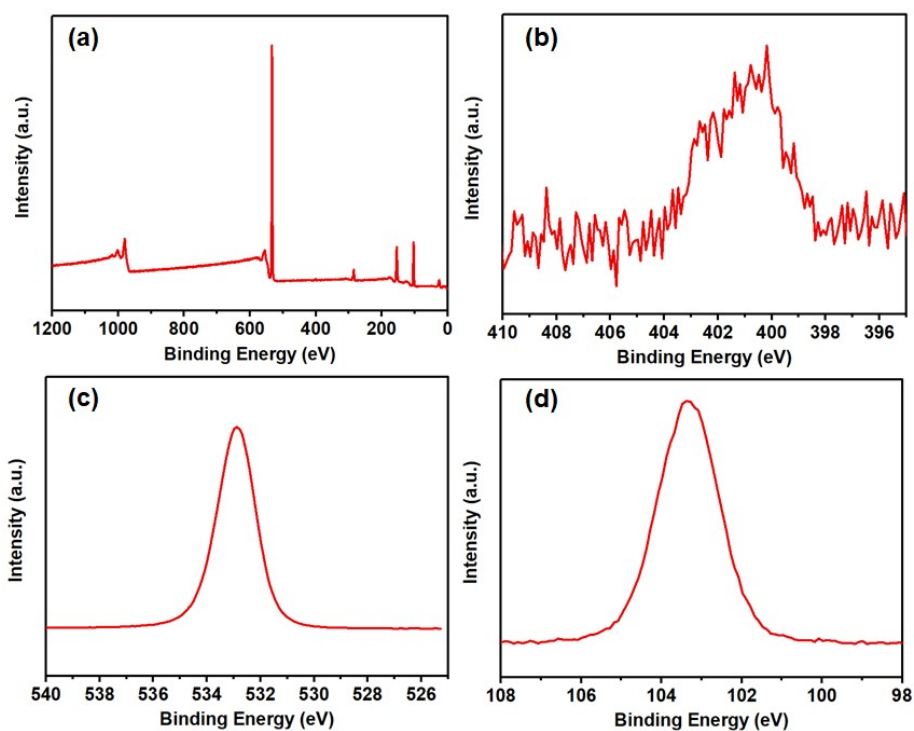

**Fig. S25** The XPS spectra of survey (a), N 1s (b), O 1s (c) and Si 2p (d) for CDs@SiO<sub>2</sub>-50R annealed at 100 °C.

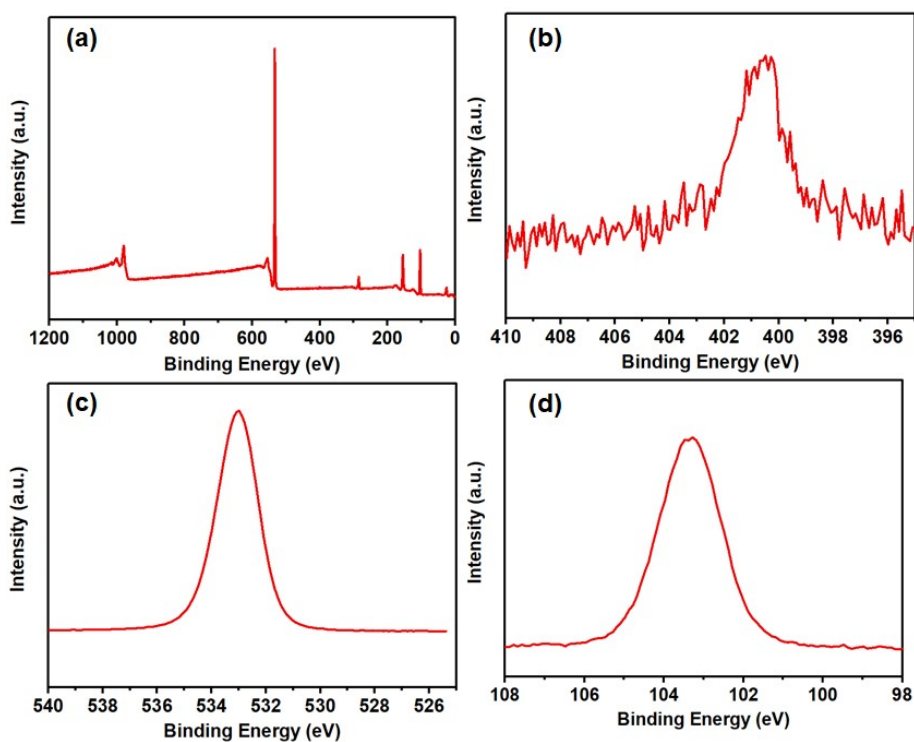

**Fig. S26** The XPS spectra of survey (a), N 1s (b), O 1s (c) and Si 2p (d) for CDs@SiO<sub>2</sub>-50R annealed at 200 °C.

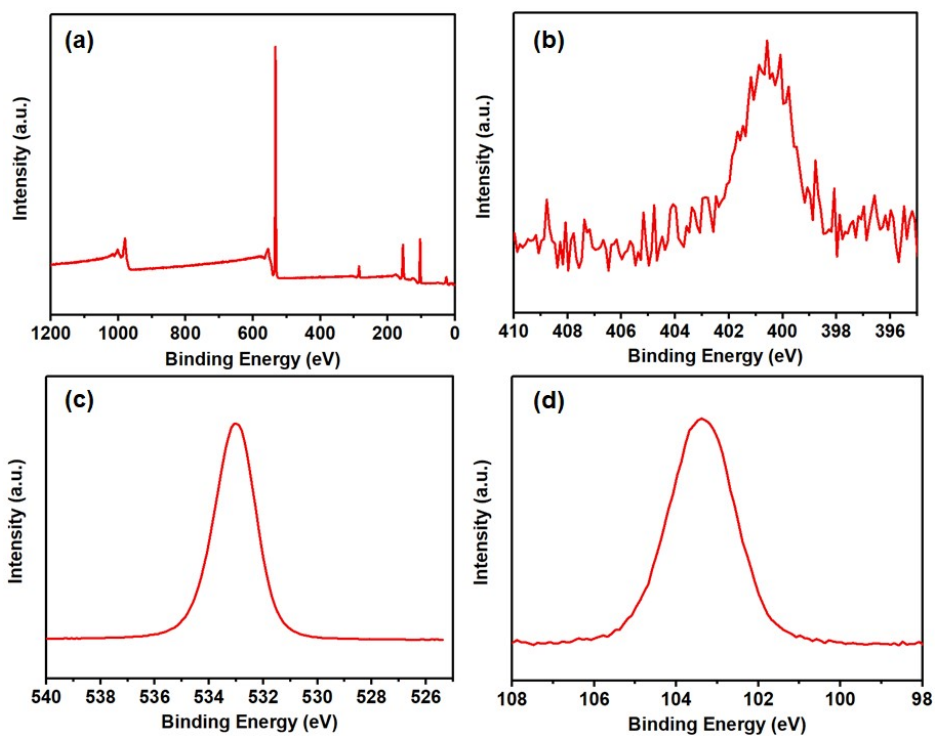

**Fig. S27** The XPS spectra of survey (a), N 1s (b), O 1s (c) and Si 2p (d) for CDs@SiO<sub>2</sub>-50R annealed at 300 °C.

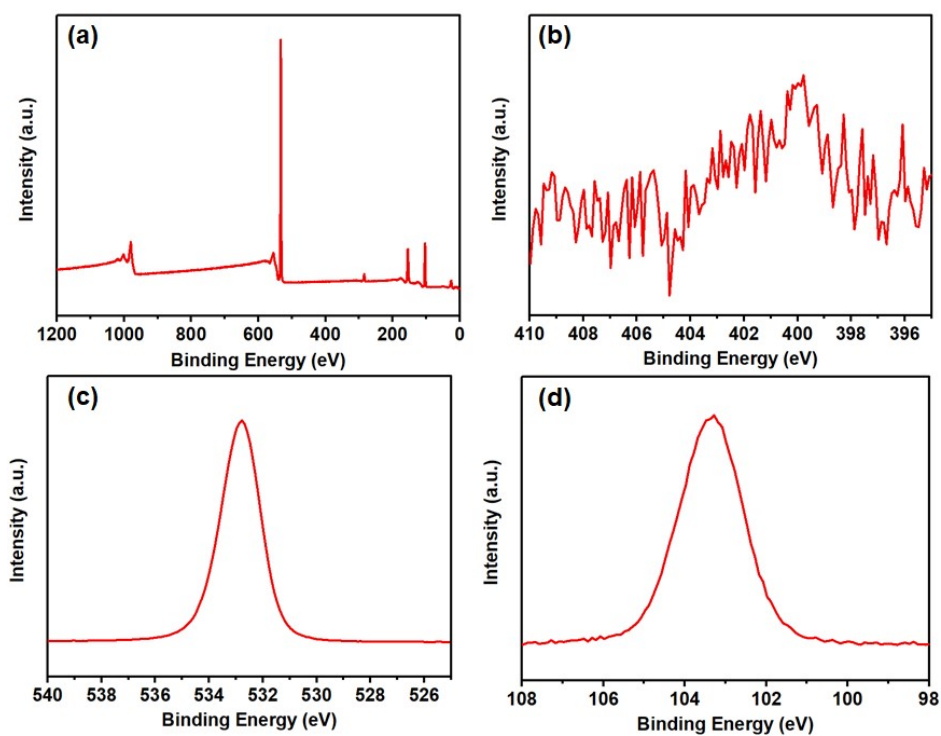

**Fig. S28** The XPS spectra of survey (a), N 1s (b), O 1s (c) and Si 2p (d) for CDs@SiO<sub>2</sub>-50R annealed at 400 °C.

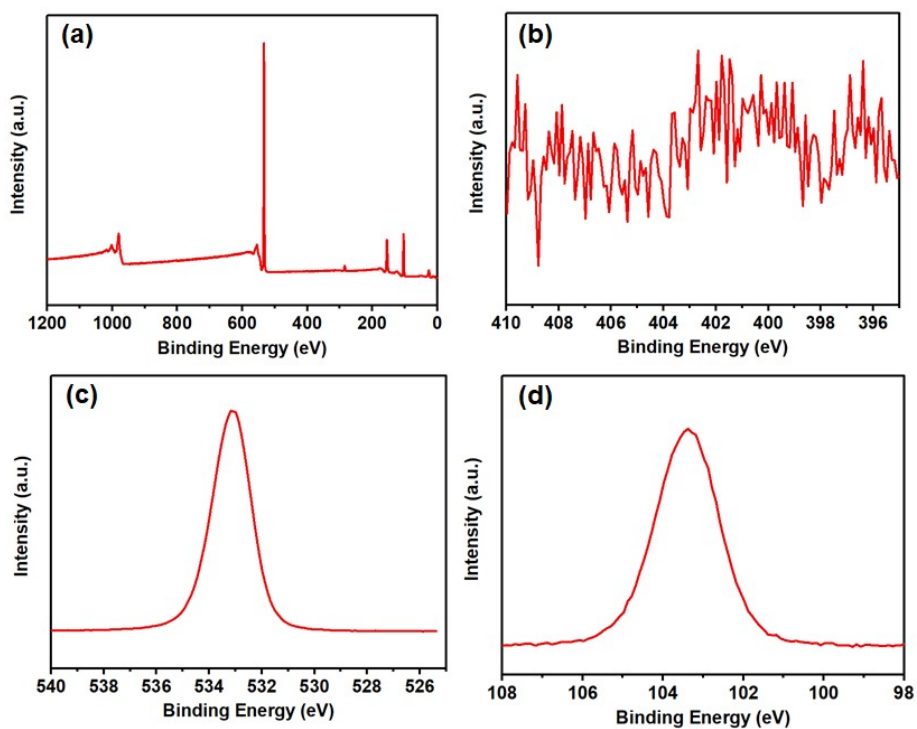

**Fig. S29** The XPS spectra of survey (a), N 1s (b), O 1s (c) and Si 2p (d) for CDs@SiO<sub>2</sub>-50R annealed at 500 °C.

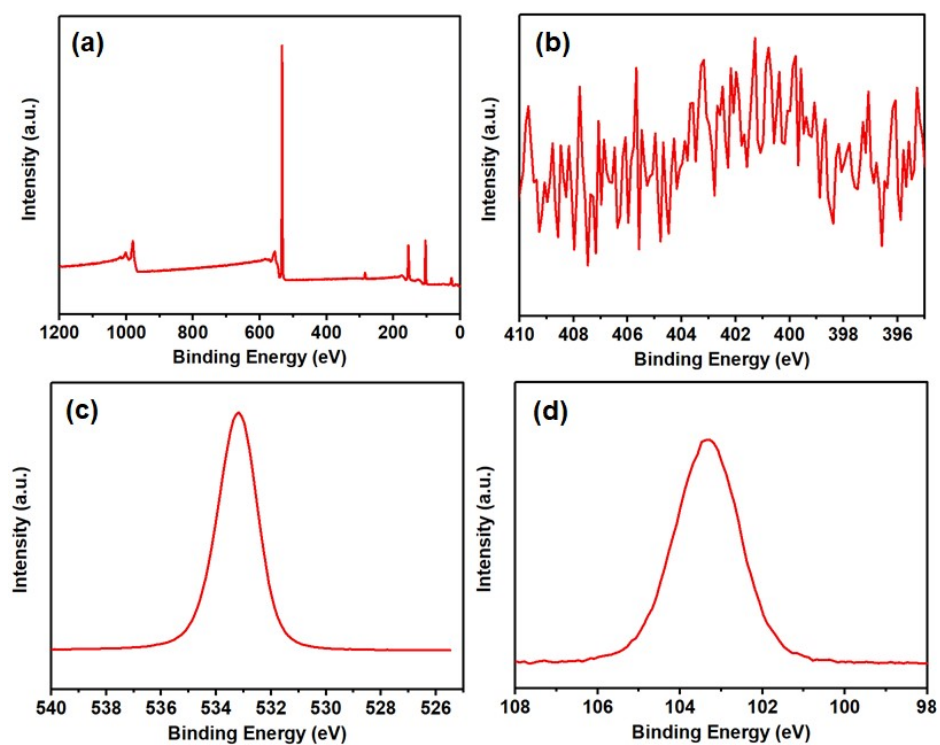

**Fig. S30** The XPS spectra of survey (a), N 1s (b), O 1s (c) and Si 2p (d) for CDs@SiO<sub>2</sub>-50R annealed at 600 °C.

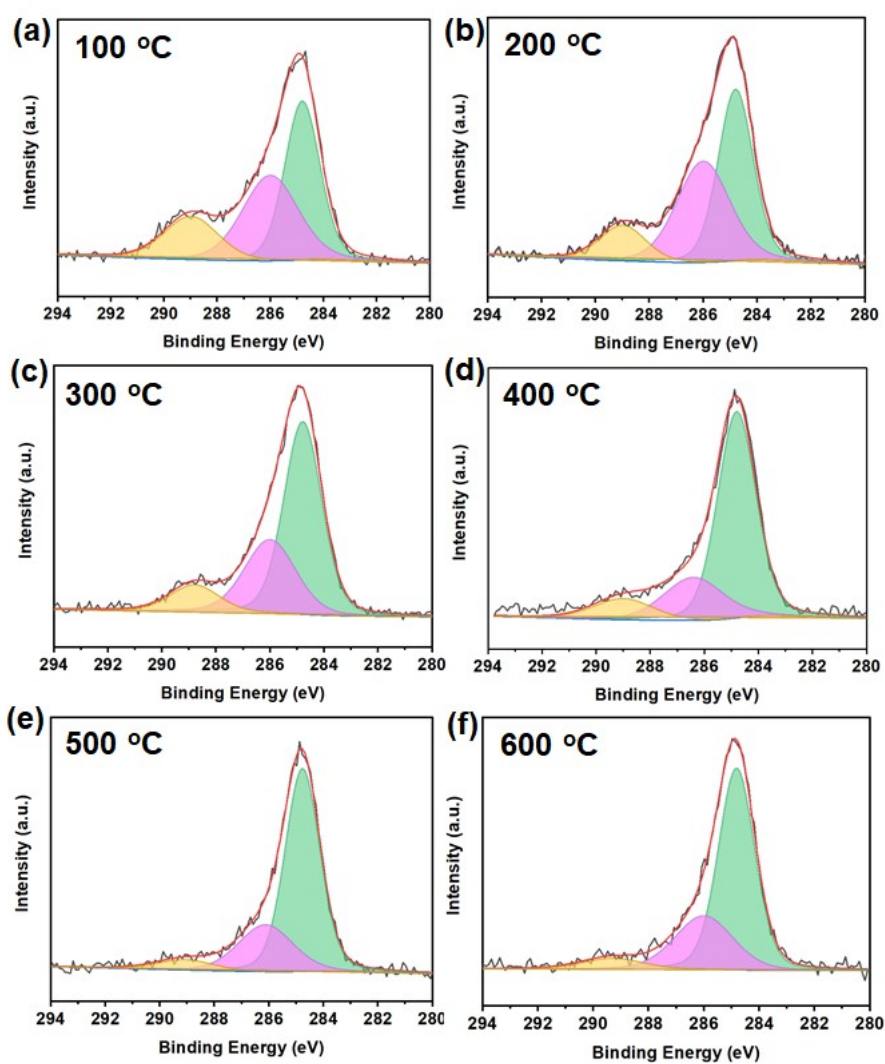

**Fig. S31** The C1s XPS spectra of the annealed products of CA/APTES@SiO<sub>2</sub>-50R at different temperatures.

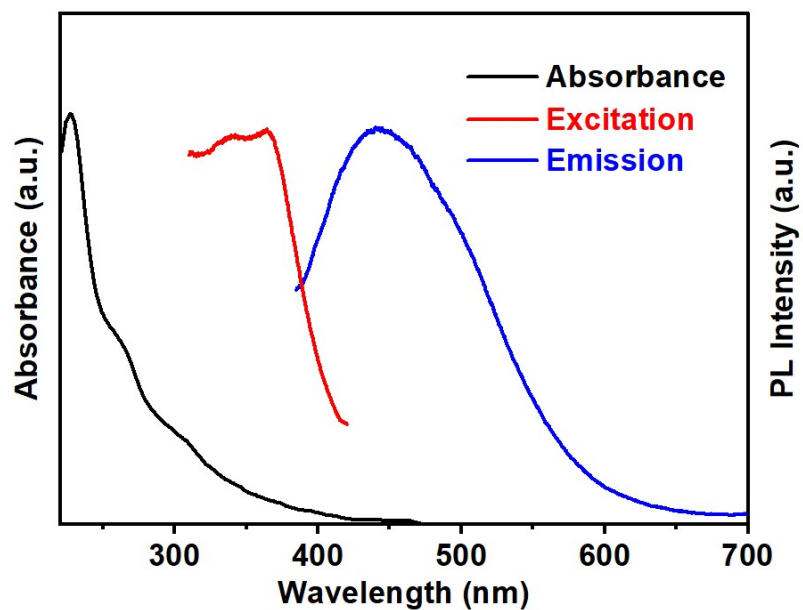

Fig. S32 UV-Vis DRS, PL excitation and emission spectra of CDs@SiO<sub>2</sub>.

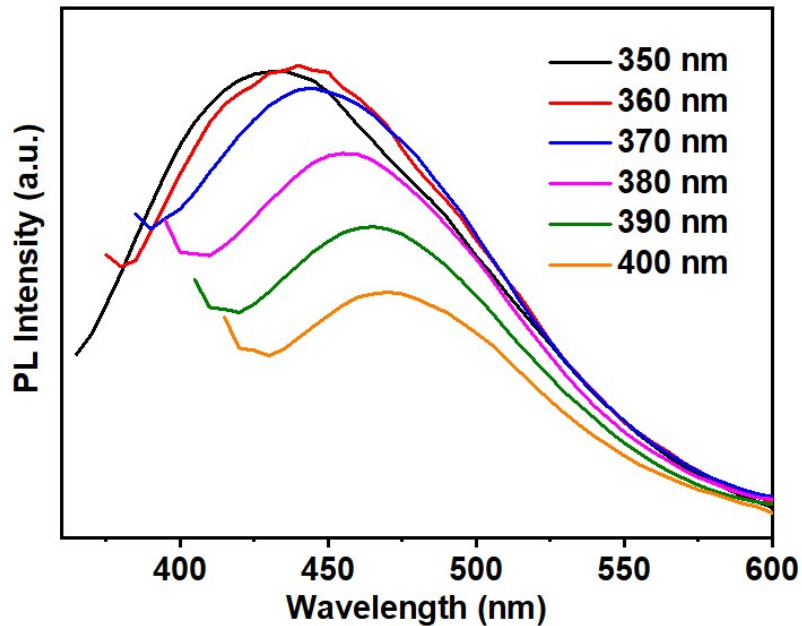

Fig. S33 PL emission spectra of CDs@SiO<sub>2</sub> under different excitation wavelengths.

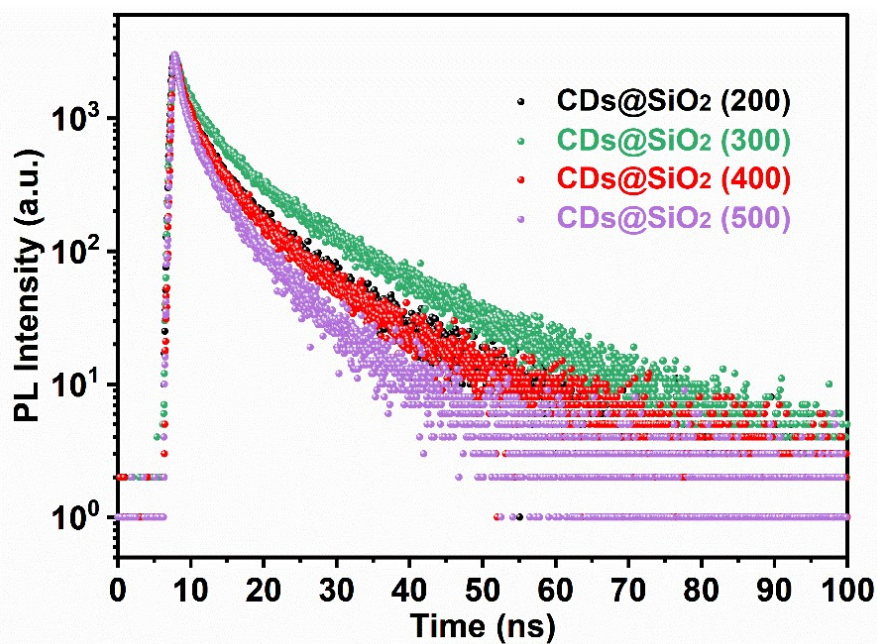

**Fig. S34** Time-resolution PL of the annealed products for the CA/APTES@SiO<sub>2</sub> precursor at different temperatures with 375 nm excitation wavelength (the number in the parenthesis represents the annealing temperature).



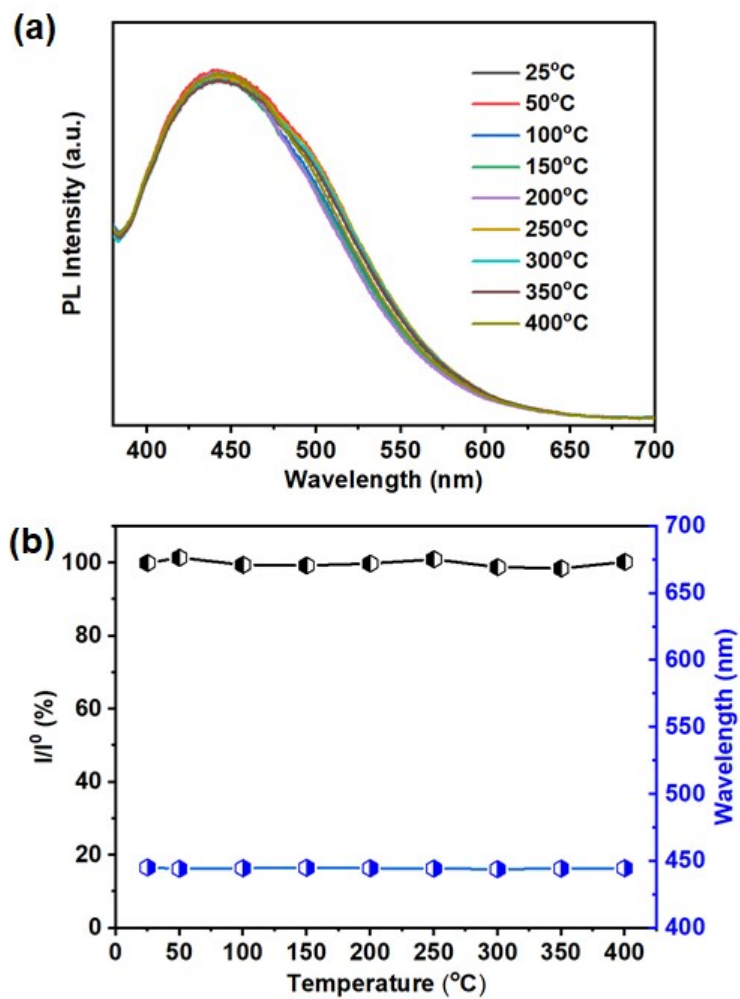

**Fig. S35** (a) Solid state PL spectra of CDs@SiO<sub>2</sub> from 25 to 400 °C in nitrogen atmosphere. (b) Integrated PL intensity and emission peak position of CDs@SiO<sub>2</sub> versus temperature ranging from 25 to 400 °C in nitrogen atmosphere.

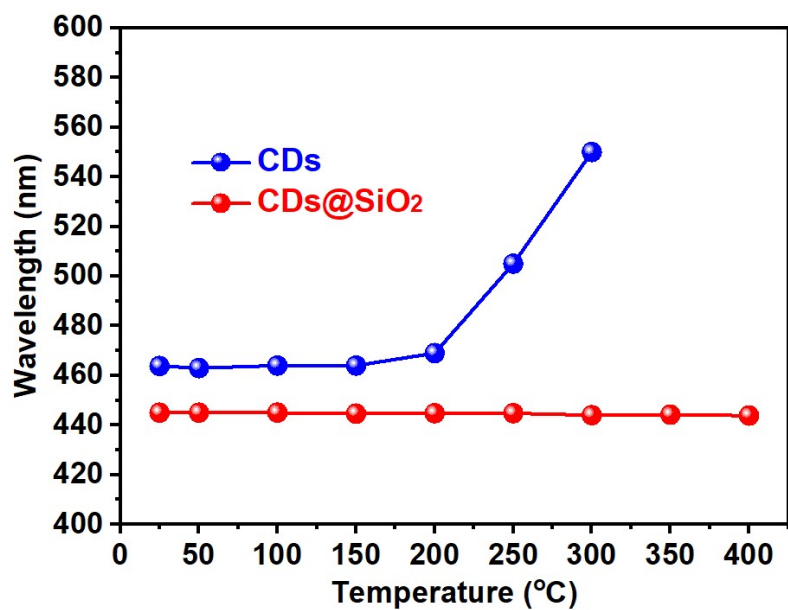

**Fig. S36** Emission peak positions of CDs@SiO<sub>2</sub> and unprotected CDs versus temperature in air atmosphere.

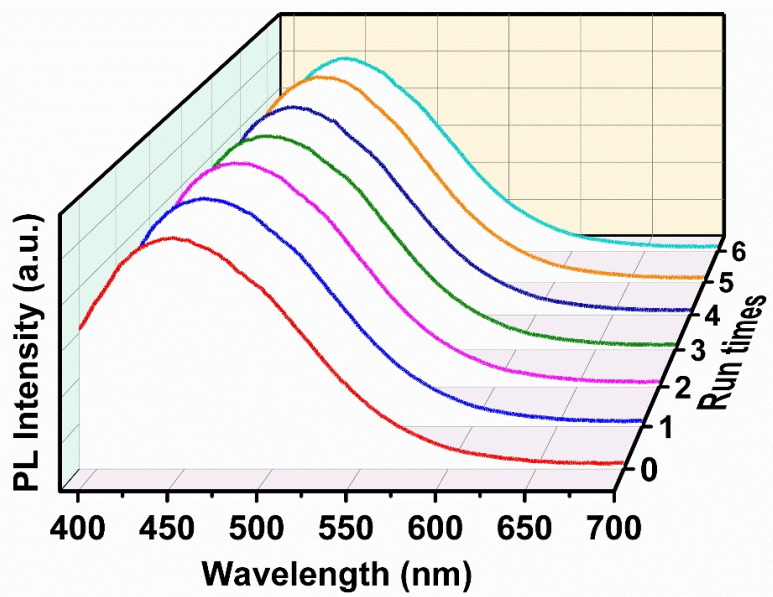

Fig. S37 PL spectra of CD@SiO<sub>2</sub> heated at 350 °C for six cycles in air atmosphere.

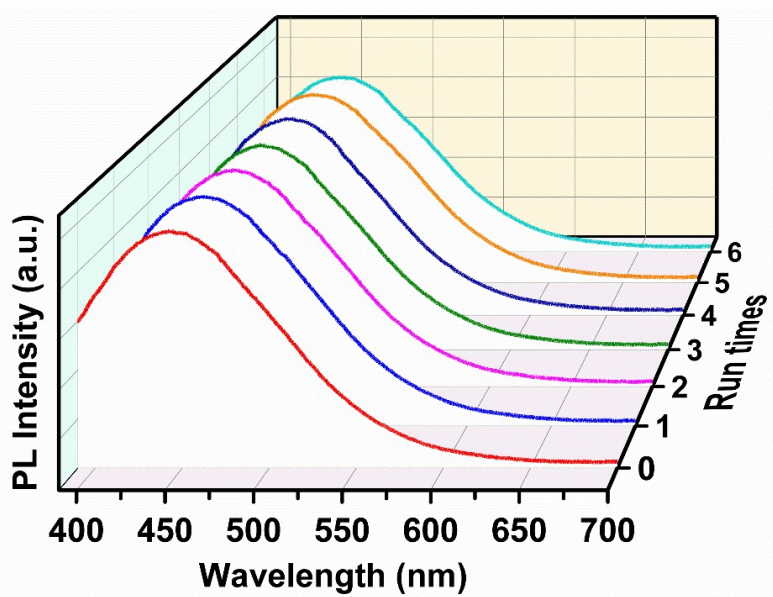

Fig. S38 PL spectra of CD@SiO<sub>2</sub> heated at 400 °C for six cycles in air atmosphere.

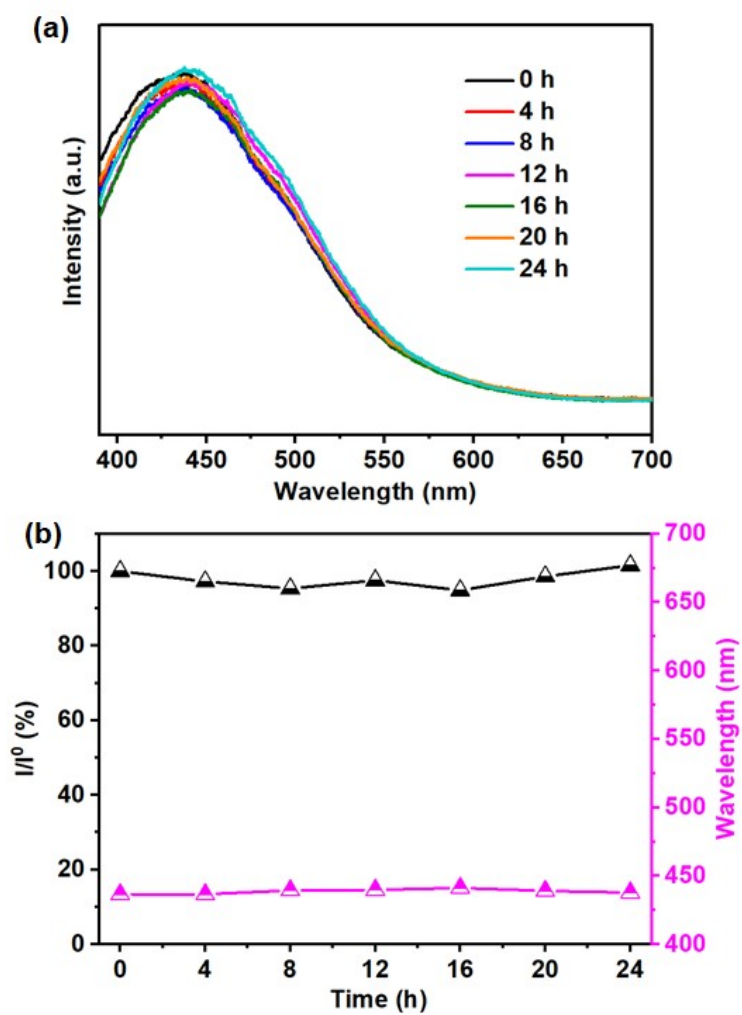

**Fig. S39** (a) PL spectra of CDs@SiO<sub>2</sub> heated at 350 °C for 24 h in air atmosphere. (b) Integrated PL intensity and emission peak position of CDs@SiO<sub>2</sub> heated at 350 °C for 24 h in air atmosphere.

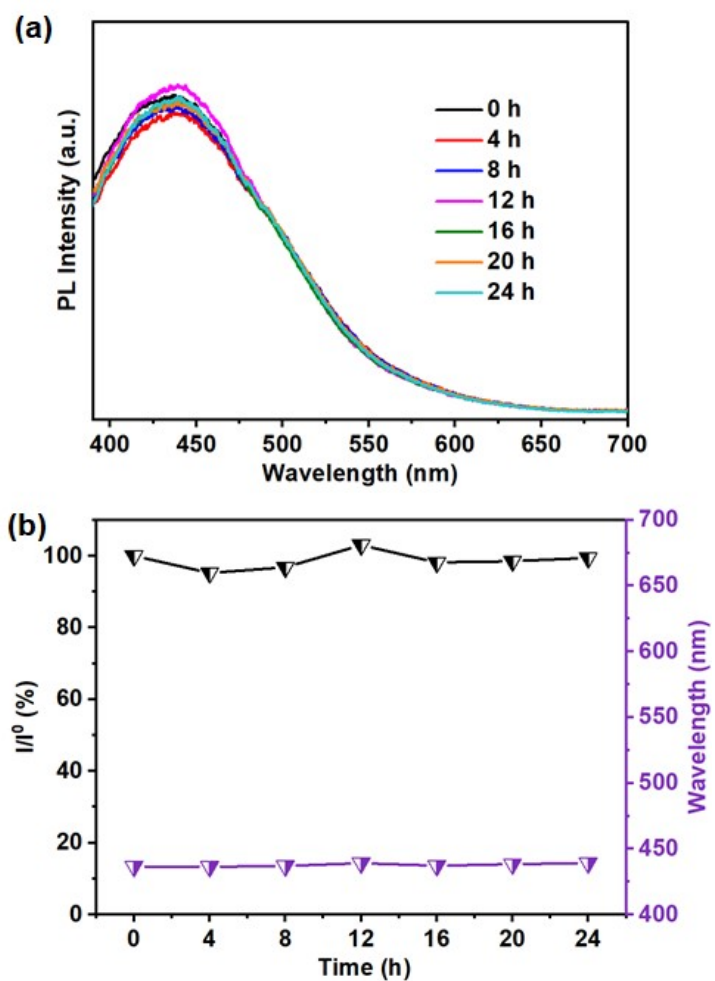

**Fig. S40** (a) PL spectra of CDs@SiO<sub>2</sub> heated at 400 °C for 24 h in air atmosphere. (b) Integrated PL intensity and emission peak position of CDs@SiO<sub>2</sub> heated at 400 °C for different times in air atmosphere.

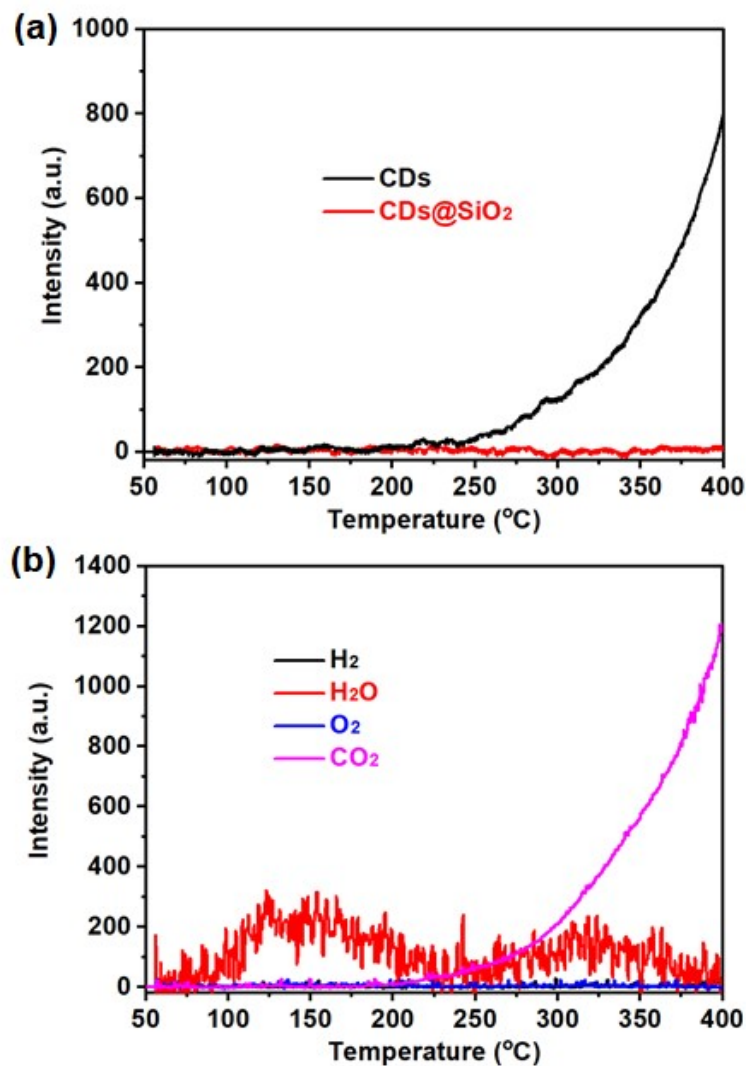

**Fig. S41** (a) O<sub>2</sub>-TPD spectra of CDs@SiO<sub>2</sub> and unprotected CDs. (b) Temperature-programmed desorption mass spectrometry of unprotected CDs.

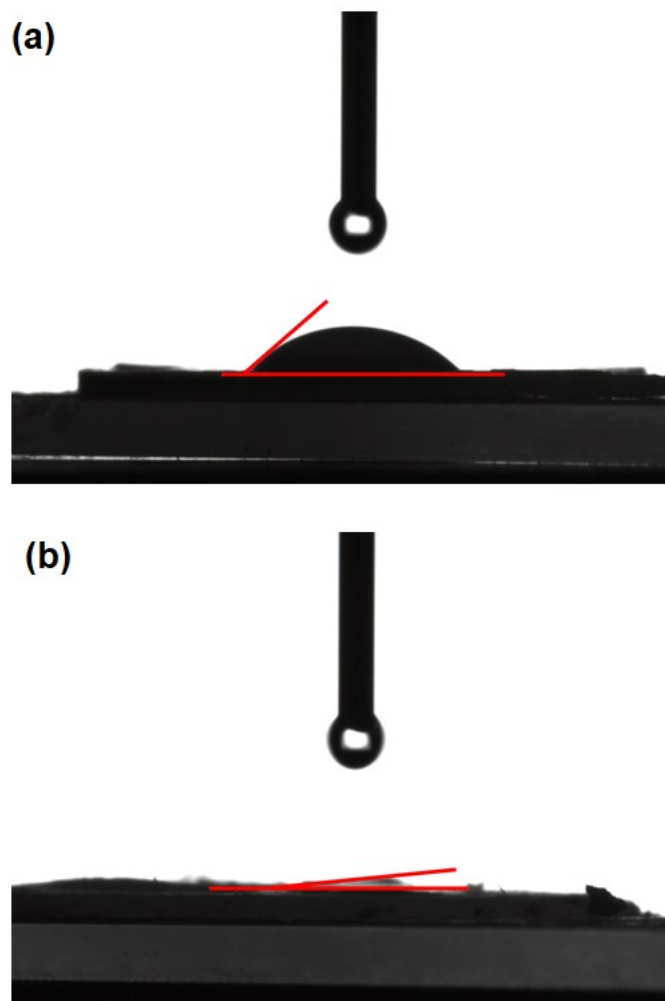

**Fig. S42** Static water contact angles of (a) CDs@SiO<sub>2</sub> composite and (b) unprotected CDs (CDs@SiO<sub>2</sub> exhibits a water contact angel of 44°, and unprotected CDs presents a super-hydrophilic water contact angel of 5°).

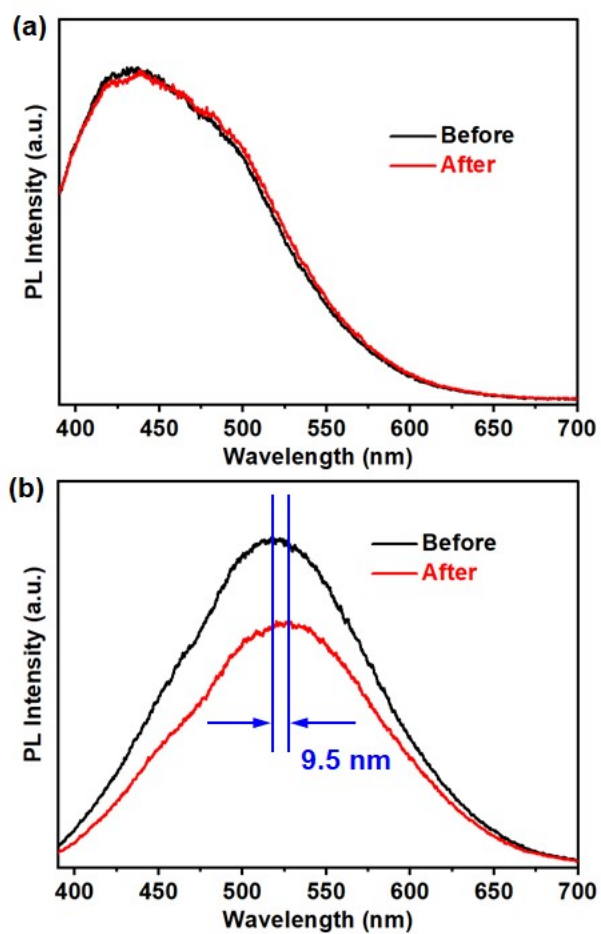

**Fig. S43** (a) PL spectra of CDs@SiO<sub>2</sub> composite dispersed in water before and after heat treatment at 100 °C for one hour. (b) PL spectra of unprotected CDs dispersed in water before and after heat treatment at 100 °C for one hour.



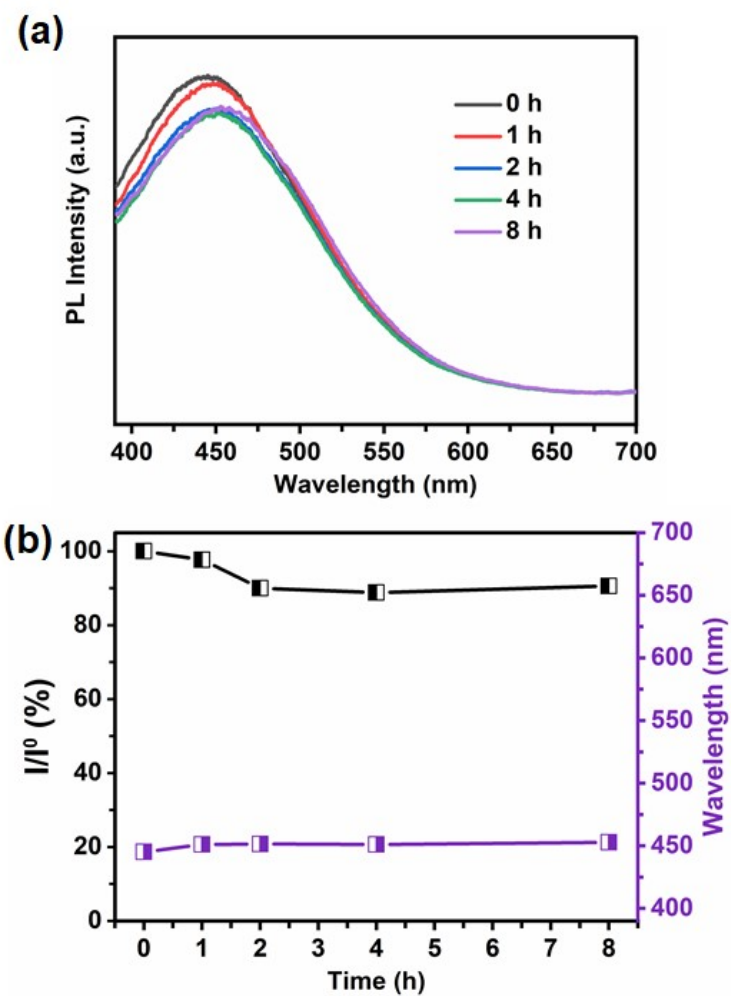

**Fig. S44** (a) Photostability of CDs@SiO<sub>2</sub> under continuous irradiation with a 365 nm UV lamp for 8 h. (b) Integrated PL intensity and emission peak for CDs@SiO<sub>2</sub> at different times.

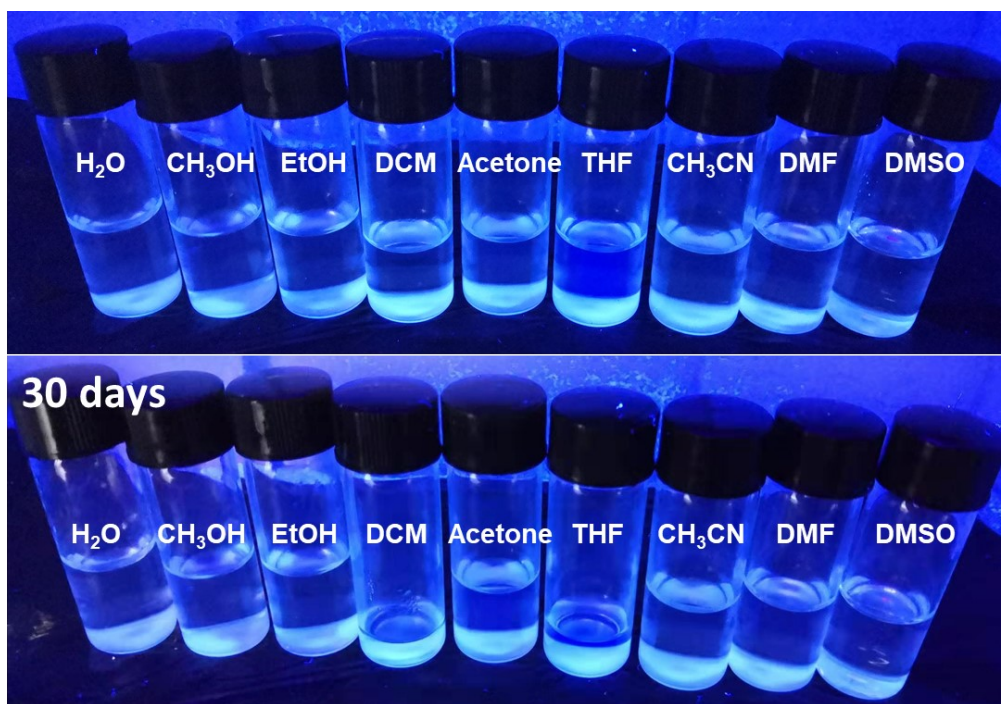

**Fig. S45** Fluorescence images of CDs@SiO<sub>2</sub> in various solvents, taken under UV light irradiation.

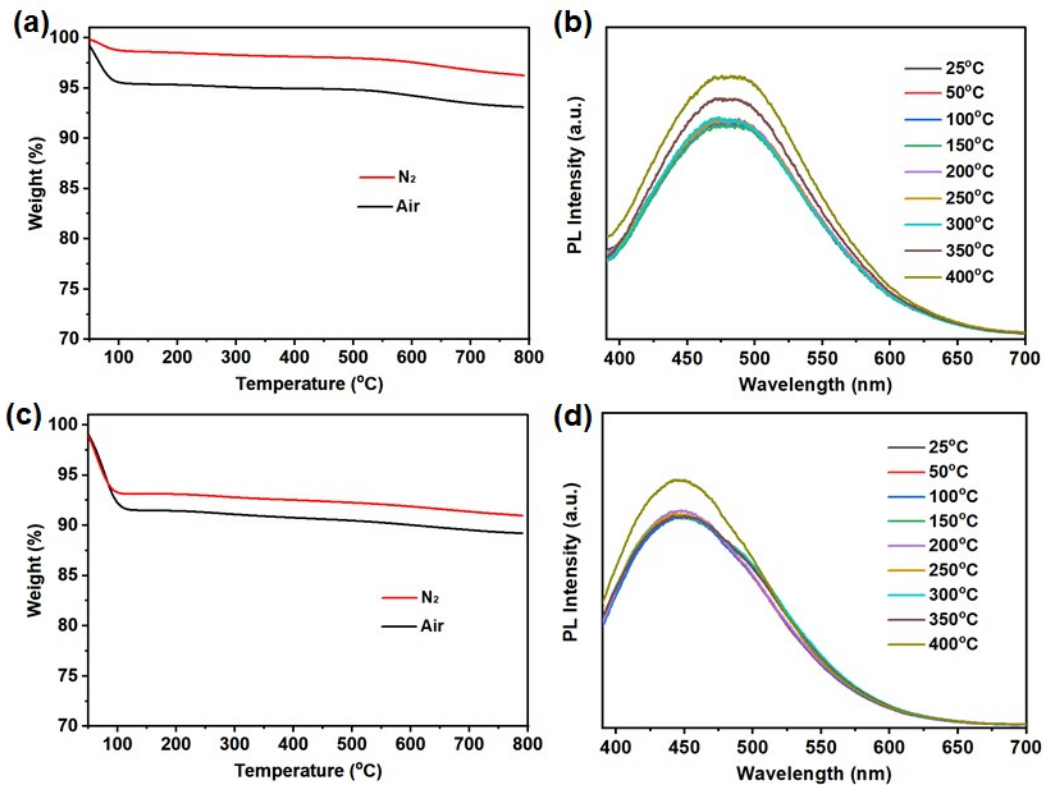

**Fig. S46** (a) TGA curves of CDs@SiO<sub>2</sub>-50R in N<sub>2</sub> and air atmospheres. (b) Solid state PL spectra of CDs@SiO<sub>2</sub>-50R treated at different temperatures in air atmosphere. (c) TGA curves of CDs@SiO<sub>2</sub>-200R in N<sub>2</sub> and air atmospheres. (d) Solid state PL spectra of CDs@SiO<sub>2</sub>-200R treated at different temperatures in air atmosphere.

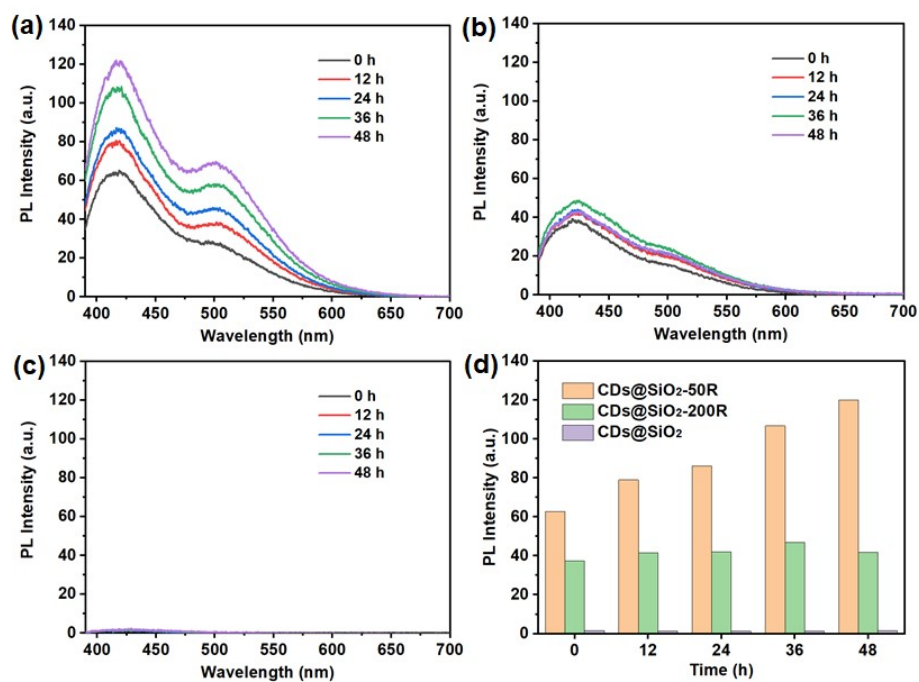

**Fig. S47** PL spectra of the supernatants of (a) CDs@SiO<sub>2</sub>-50R, (b) CDs@SiO<sub>2</sub>-200R and (c) CDs@SiO<sub>2</sub> at different intervals. (d) The PL intensities of the supernatants of CDs@SiO<sub>2</sub>-50R, CDs@SiO<sub>2</sub>-200R and CDs@SiO<sub>2</sub> at different intervals.

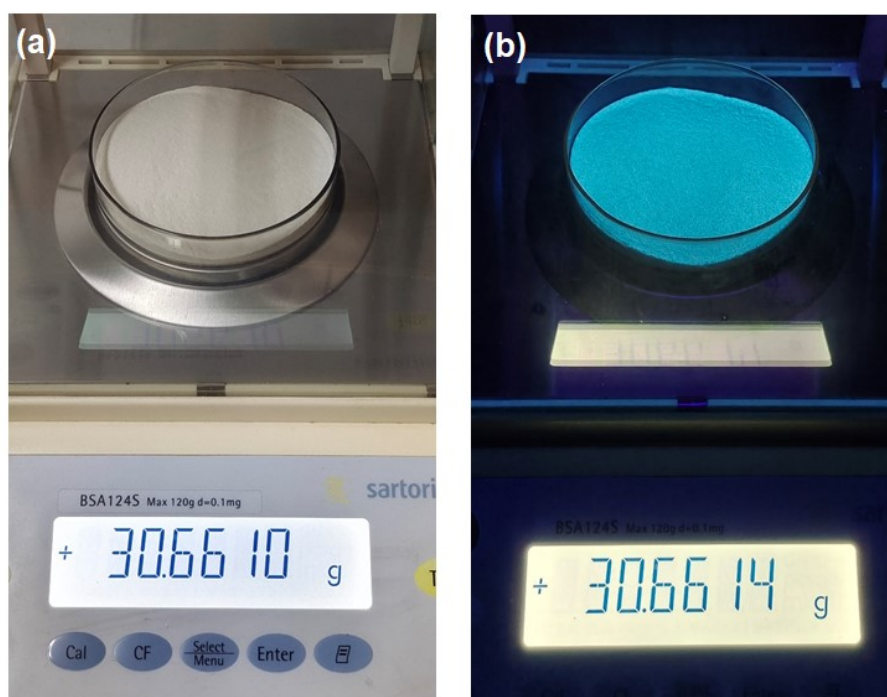

**Fig. S48** Optical images of CDs@SiO<sub>2</sub> phosphors, taken under daylight (a) and UV light (b) irradiation.

## Tables

**Table S1** Textual properties of different materials

| Sample                          | S <sub>BET</sub><br>(m <sup>2</sup> /g) | S <sub>micro</sub><br>(m <sup>2</sup> /g) | S <sub>ext</sub><br>(m <sup>2</sup> /g) | V <sub>pore</sub><br>(cm <sup>3</sup> /g) | V <sub>micro</sub><br>(cm <sup>3</sup> /g) |
|---------------------------------|-----------------------------------------|-------------------------------------------|-----------------------------------------|-------------------------------------------|--------------------------------------------|
| CA/APTES@SiO <sub>2</sub> -50R  | 556                                     | 26                                        | 530                                     | 0.51                                      | 0.058                                      |
| CDs@SiO <sub>2</sub> -50R       | 607                                     | 204                                       | 403                                     | 0.67                                      | 0.29                                       |
| CA/APTES@SiO <sub>2</sub> -200R | 738                                     | 117                                       | 621                                     | 0.65                                      | 0.12                                       |
| CDs@SiO <sub>2</sub> -200R      | 762                                     | 180                                       | 582                                     | 0.65                                      | 0.16                                       |
| CA/APTES@SiO <sub>2</sub>       | 740                                     | 151                                       | 588                                     | 0.78                                      | 0.20                                       |
| CDs@SiO <sub>2</sub>            | 740                                     | 171                                       | 569                                     | 0.77                                      | 0.21                                       |

**Table S2** C 1s bonding states from XPS peak fitting for the annealed products of the CA/APTES@SiO<sub>2</sub> precursor at different temperatures

| Sample                     | C-C/C=C (%) | C-O/C-N (%) | O-C=O (%) |
|----------------------------|-------------|-------------|-----------|
| CDs@SiO <sub>2</sub> (100) | 61.74       | 26.72       | 11.54     |
| CDs@SiO <sub>2</sub> (200) | 68.08       | 25.49       | 6.43      |
| CDs@SiO <sub>2</sub> (300) | 69.95       | 23.85       | 6.20      |
| CDs@SiO <sub>2</sub> (400) | 73.21       | 20.12       | 6.68      |
| CDs@SiO <sub>2</sub> (500) | 74.14       | 19.44       | 6.42      |
| CDs@SiO <sub>2</sub> (600) | 72.15       | 23.39       | 4.46      |

**Note:** the number in the parenthesis represents the annealing temperature.

**Table S3** C 1s bonding states from XPS peak fitting for the annealed products of the CA/APTES@SiO<sub>2</sub>-50R precursor at different temperatures

| Sample                          | C-C/C=C (%) | C-O/C-N (%) | O-C=O (%) |
|---------------------------------|-------------|-------------|-----------|
| CDs@SiO <sub>2</sub> -50R (100) | 44.1        | 37.4        | 18.4      |
| CDs@SiO <sub>2</sub> -50R (200) | 46.2        | 41.2        | 12.6      |
| CDs@SiO <sub>2</sub> -50R (300) | 59.1        | 30.5        | 10.4      |
| CDs@SiO <sub>2</sub> -50R (400) | 67.3        | 21.9        | 10.8      |
| CDs@SiO <sub>2</sub> -50R (500) | 69.3        | 25.0        | 5.7       |
| CDs@SiO <sub>2</sub> -50R (600) | 66.2        | 28.0        | 5.8       |

**Note:** the number in the parenthesis represents the annealing temperature.

**Table S4** Life time of the annealed products of the CA/APTES@SiO<sub>2</sub> precursor at different temperatures

| Sample                     | $\tau_1$<br>(ns) | A <sub>1</sub><br>(%) | $\tau_2$<br>(ns) | A <sub>2</sub><br>(%) | $\tau_3$<br>(ns) | A <sub>3</sub><br>(%) | $\tau_{ave}$<br>(ns) |
|----------------------------|------------------|-----------------------|------------------|-----------------------|------------------|-----------------------|----------------------|
| CDs@SiO <sub>2</sub> (200) | 12.12            | 44.9                  | 3.41             | 45.4                  | 0.67             | 9.7                   | 3.21                 |
| CDs@SiO <sub>2</sub> (300) | 14.78            | 52.8                  | 4.18             | 40.4                  | 0.87             | 6.7                   | 4.77                 |
| CDs@SiO <sub>2</sub> (400) | 12.65            | 37.1                  | 3.74             | 47.2                  | 1.02             | 15.7                  | 3.24                 |
| CDs@SiO <sub>2</sub> (500) | 10.97            | 26.7                  | 3.60             | 52.4                  | 0.82             | 20.9                  | 2.35                 |

**Note:** the number in the parenthesis represents the annealing temperature.

**Table S5** Summary of the thermal stability of solid-state CDs

| Matrix                         | Treating temperature<br>(°C) | PL intensity<br>retention (%) | Ref.      |
|--------------------------------|------------------------------|-------------------------------|-----------|
| LDH                            | 100                          | 80                            | S2        |
| Silica                         | 100                          | 95                            | S3        |
| AlOOH                          | 150                          | 80                            | S4        |
| Mg(OH) <sub>2</sub>            | 150                          | 89.6                          | S5        |
| Al <sub>2</sub> O <sub>3</sub> | 150                          | 121.6                         | S6        |
| BaCl <sub>2</sub>              | 200                          | 74.7                          | S7        |
| BaSO <sub>4</sub>              | 300                          | 90                            | S8        |
| SBA-15                         | 400                          | 60                            | S9        |
| SiO <sub>2</sub>               | 400                          | >99                           | This work |

Note: LDH referred to layered double hydroxides.

## References

- S1 Y. Zhan, B. Shang, M. Chen and L. Wu, *Small*, 2019, **15**, 1901161.
- S2 W. Liu, R. Liang and Y. Lin, *Nanoscale*, 2020, **23**, 7888-7894.
- S3 M. Wang, Y. Han, Z. Guo, Z. Huang and W. Yang, *ACS Appl. Nano Mater.*, 2021, **4**, 13625-13632.
- S4 J. Wu, S. Wang, S. Liu, S. Ma, G. Jing, Y. Hu, M. Wang, Z. Ye and X. Cheng, *J. Mater. Chem. C*, 2019, **7**, 14717-14724.
- S5 Y. Xie, X. Geng, J. Gao, W. Shi, Z. Zhou, H. Wang, D. Zhang, B. Deng and R. Yu, *J. Alloys Compd.*, 2021, **873**, 159663.
- S6 J. Chen, X. Zou, W. Li, H. Zhang, X. Zhang, M. S. Molokeev, Y. Liu and B. Lei, *Adv. Opt. Mater.*, 2022, **10**, 2200851.
- S7 J. Liang, B. Yang, C.-Y. Zhong, J. Zhang, J. He, Y. Chen and Z.-Q. Liu, *Inorg. Chem. Front.*, 2020, **7**, 4845-4853.
- S8 D. Zhou, Y. Zhai, S. Qu, D. Li, P. Jing, W. Ji, D. Shen and A. L. Rogach, *Small*, 2017, **13**, 1602055.
- S9 Q. Chang, S. Yang, C. Xue, N. Li, Y. Wang, Y. Li, H. Wang, J. Yang and S. Hu, *Nanoscale*, 2019, **11**, 7247-7255.
